# Supplementary material for: Adaptor linked K63 di-ubiquitin activates Nedd4/Rsp5 E3 ligase
Source: eLife journal article supplement (doi:10.7554/elife.77424), 2022-06-28

## 1. Mono-Ub variants purification:

(A) Ub-WT mutant, S200, gel filtration

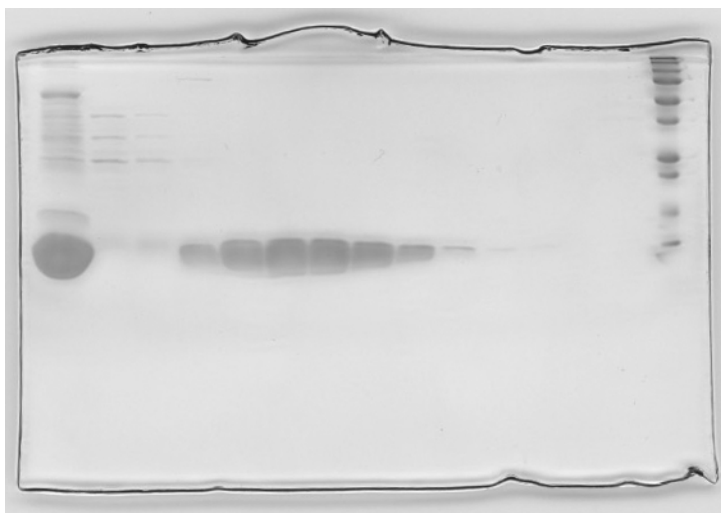

(B) I44A mutant, S200, gel filtration

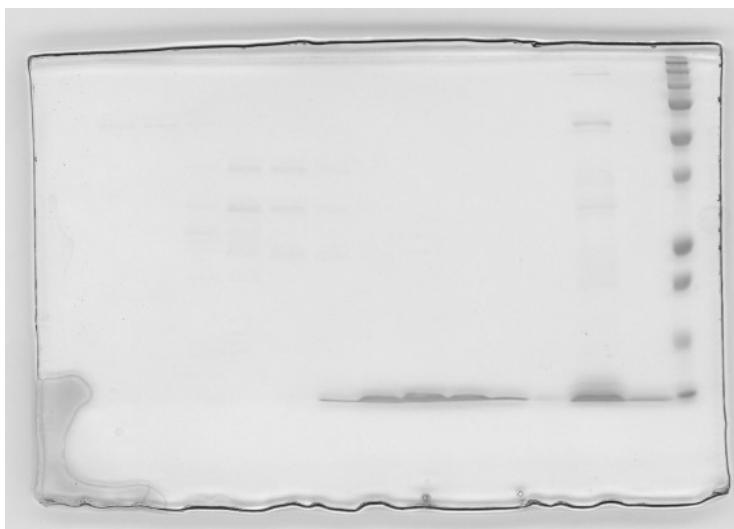

## 2. K63 linked di-Ub purification:

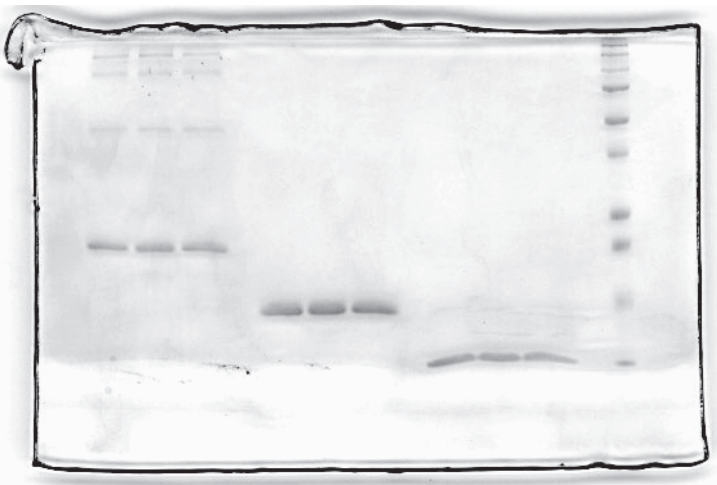

## 3. M1 linked di-Ub purification:

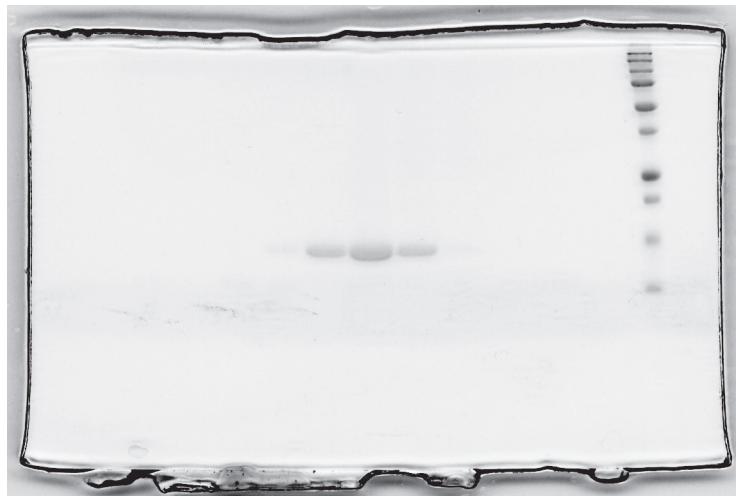

## 4. K48 linked di-Ub purification:

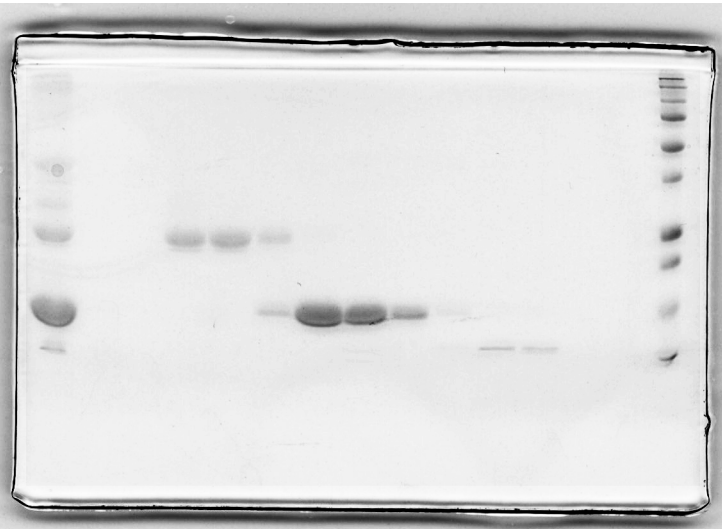

## 5. K63 linked di-Ub (Ub<sup>WT</sup>-Ub<sup>I44A</sup>) purification:

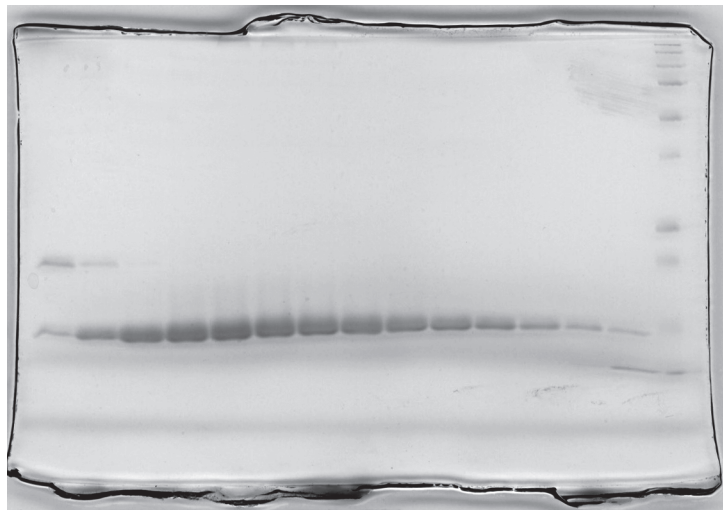

#### 6. Rsp5 HECT domain purification:

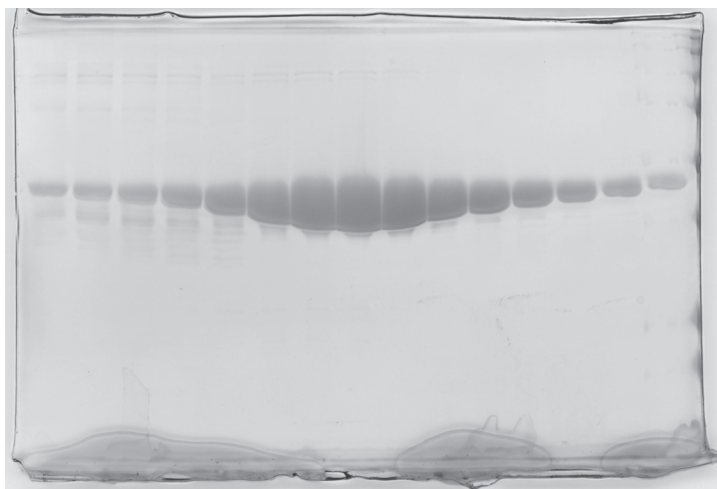

#### 7. Rsp5 ww1-HECT domain purification:

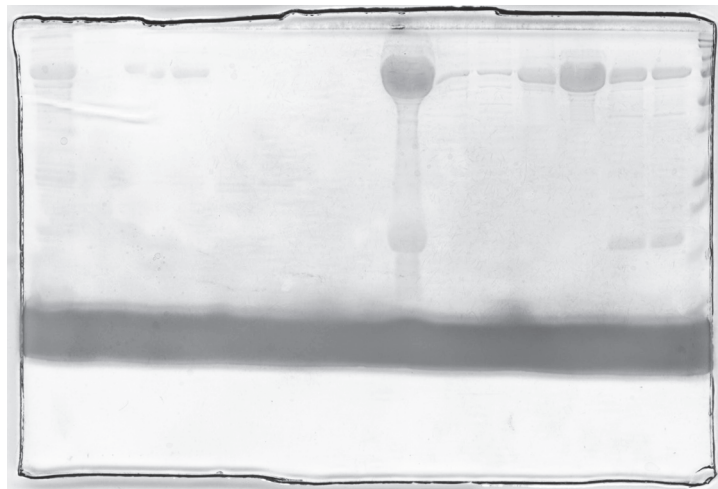

#### 8. PY1-2(Art1) and PY1-2(*art1*<sup>ΔPY</sup>) purification:

(A) PY1-2(Art1), S200, gel filtration

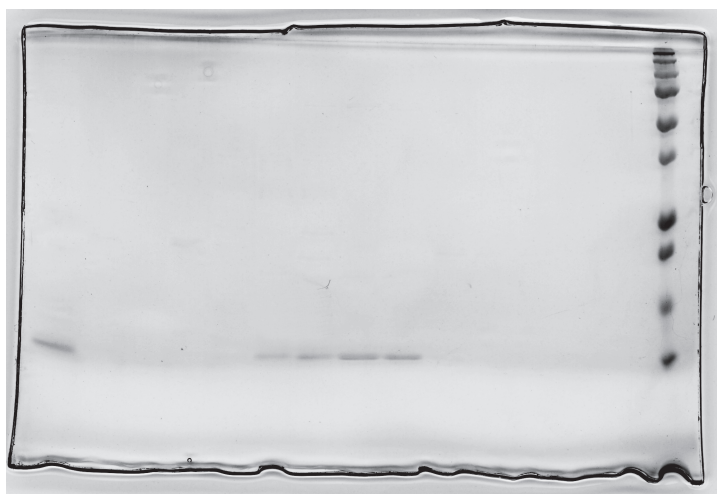

(B) PY1-2(*art1*<sup>ΔPY</sup>), S200, gel filtration

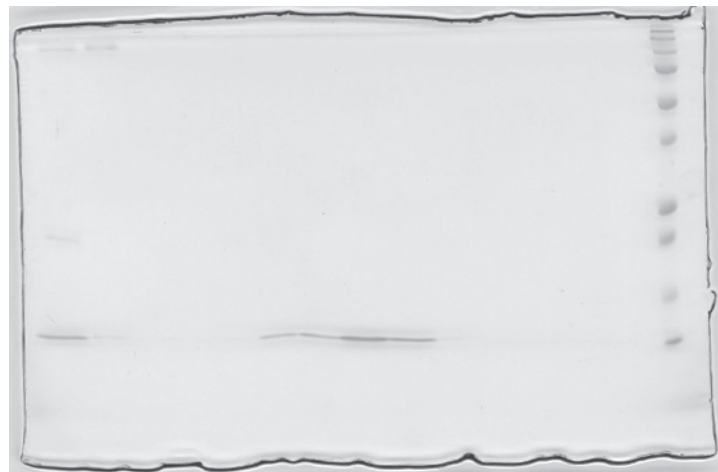

#### 9. PY1-3(Art5) and PY1-3(*art5*<sup>ΔPY</sup>) purification:

(A) PY1-3(Art5), S200, gel filtration

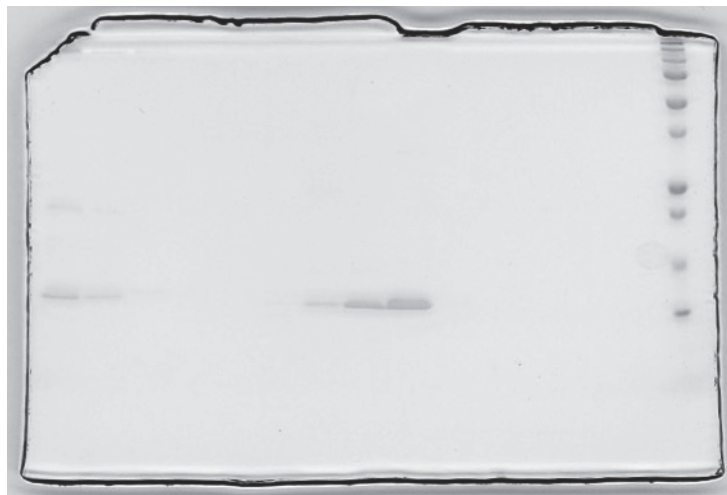

(B) PY1-3(*art5*<sup>ΔPY</sup>), S200, gel filtration

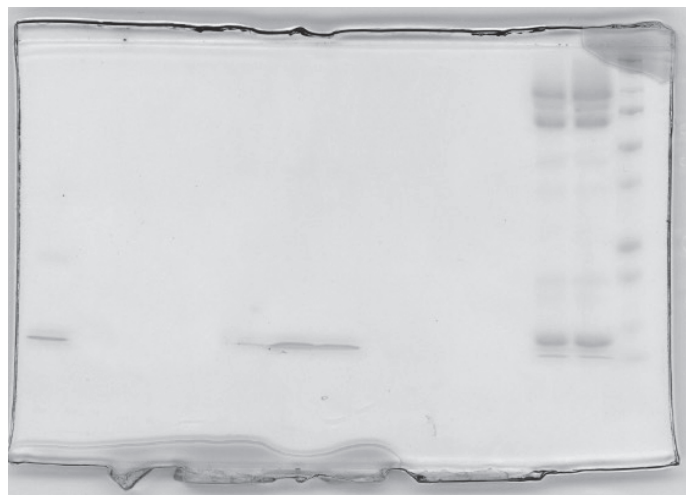

### 10. Pub1 purification:

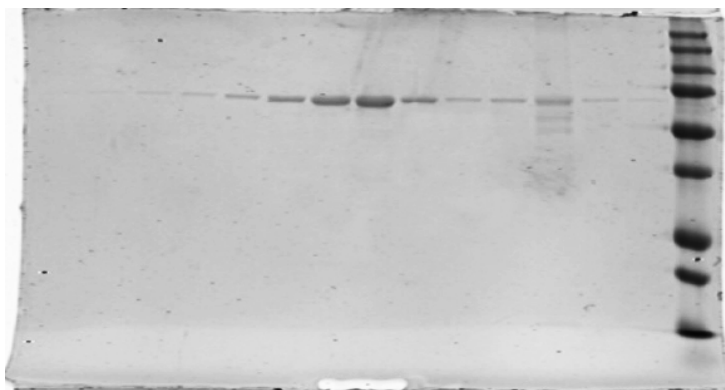

### 11. Any1 purification:

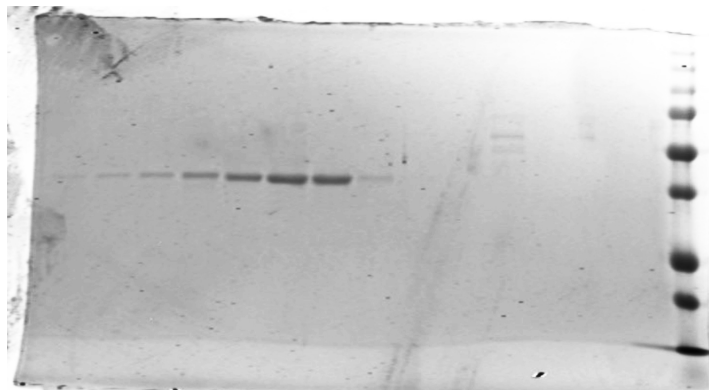

### 12. Any1-diUb purification.

(A) Synthesis of Any1-diUb

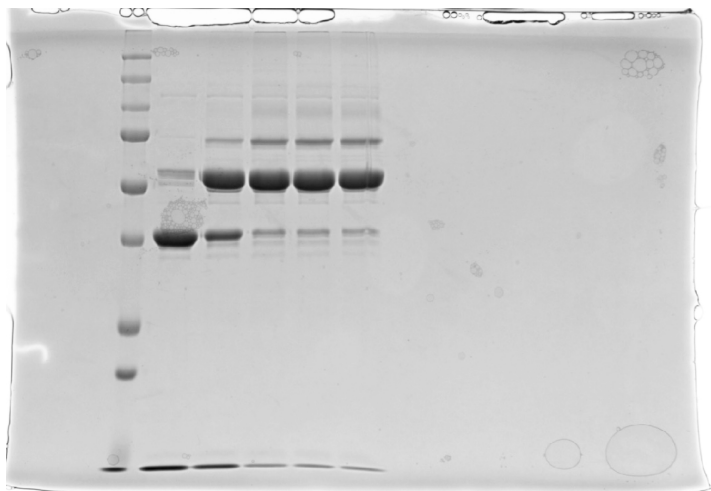

(B) Any1-diUb purification by S200 gel filtration.

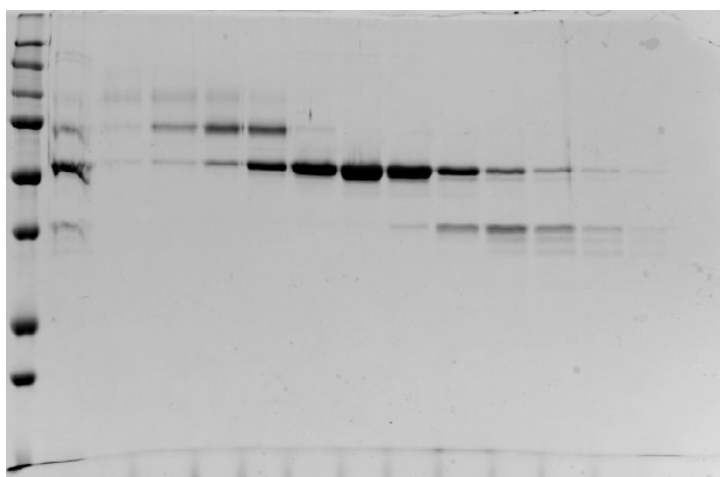

Supplement: data2 [file elife-77424-data2-v2.pdf]
