# Supplementary material for: Adaptor linked K63 di-ubiquitin activates Nedd4/Rsp5 E3 ligase
Source: eLife journal article supplement (doi:10.7554/elife.77424), 2022-06-28
Supplement: fig5-figsupp2-data1 [file elife-77424-fig5-figsupp2-data1-v2.pdf]

**A**

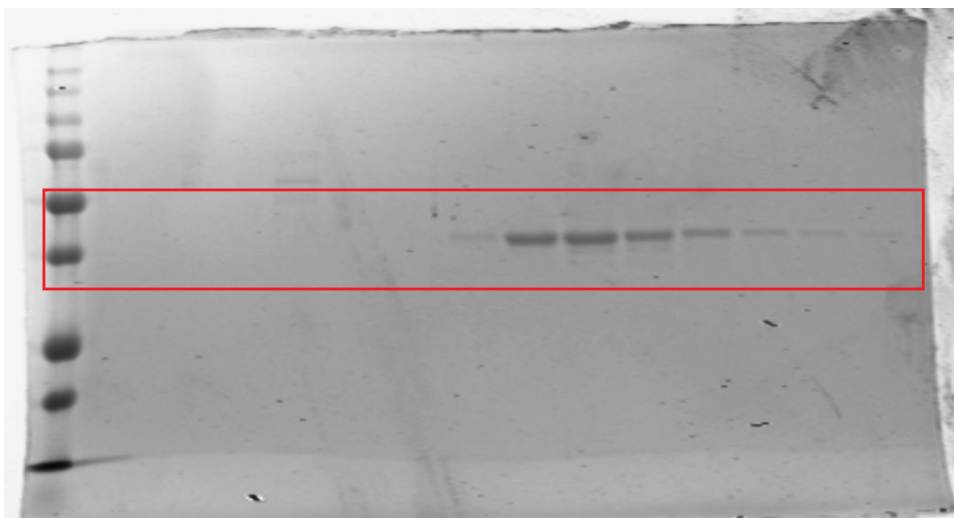

**B**

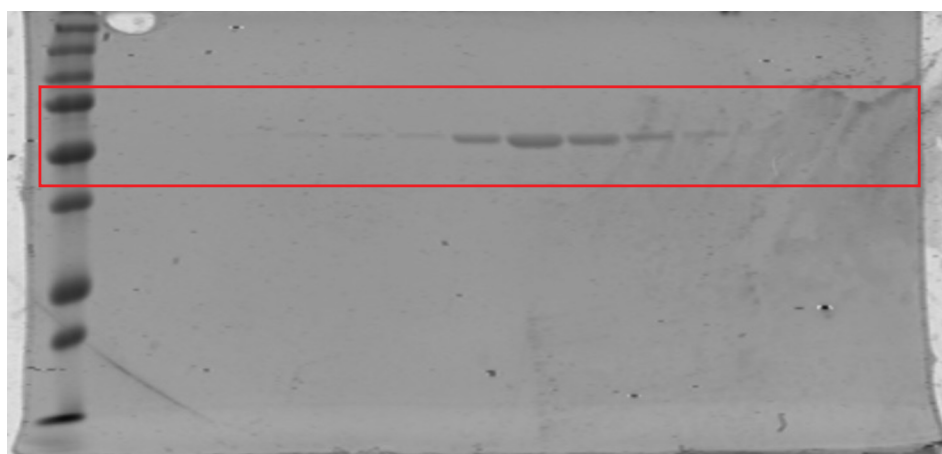

**C**

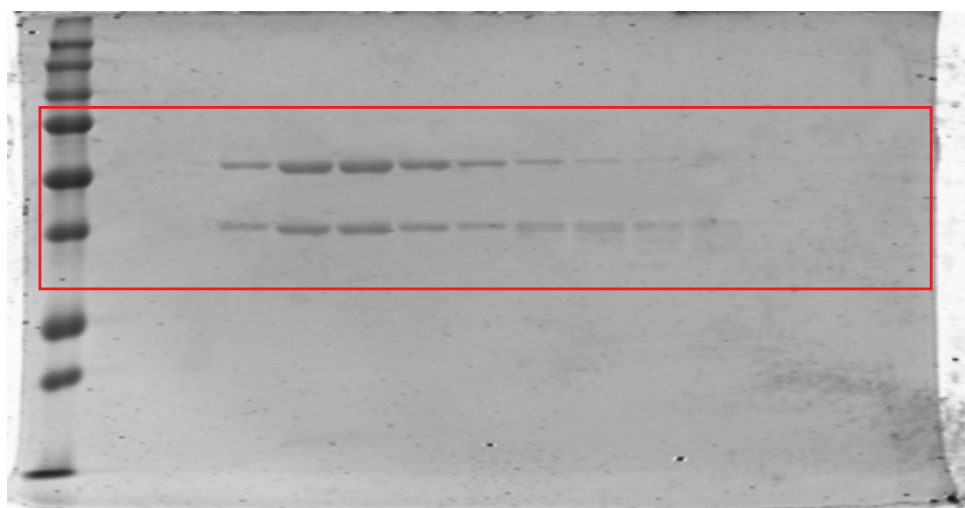

**Figure 5-figure supplement 2**
