# Supplementary material for: Adaptor linked K63 di-ubiquitin activates Nedd4/Rsp5 E3 ligase
Source: eLife journal article supplement (doi:10.7554/elife.77424), 2022-06-28
Supplement: fig6-figsupp1-data1 [file elife-77424-fig6-figsupp1-data1-v2.pdf]

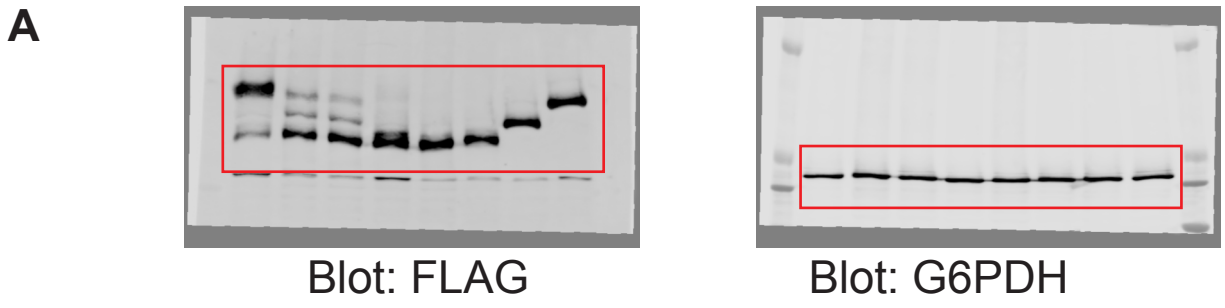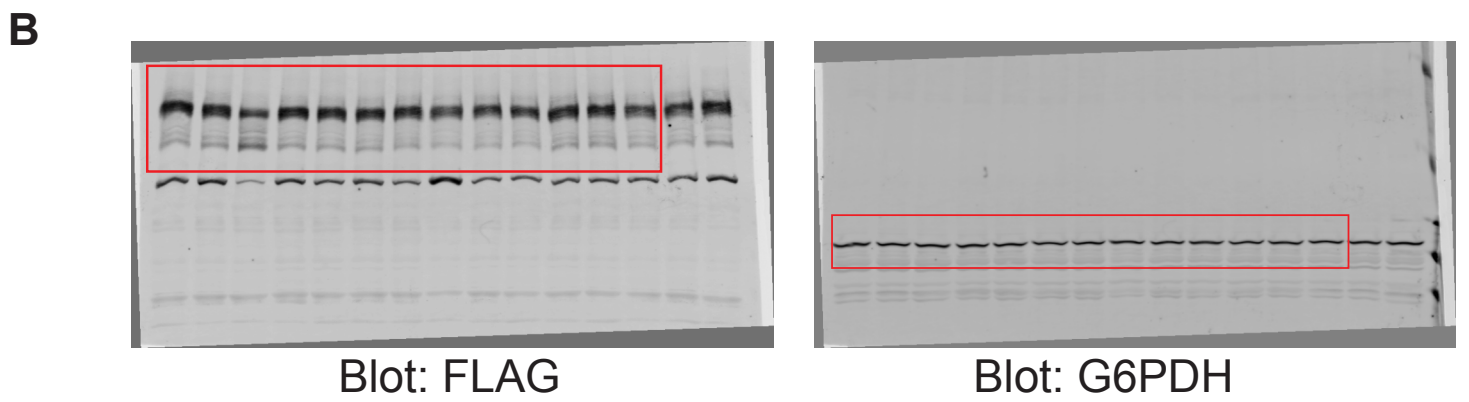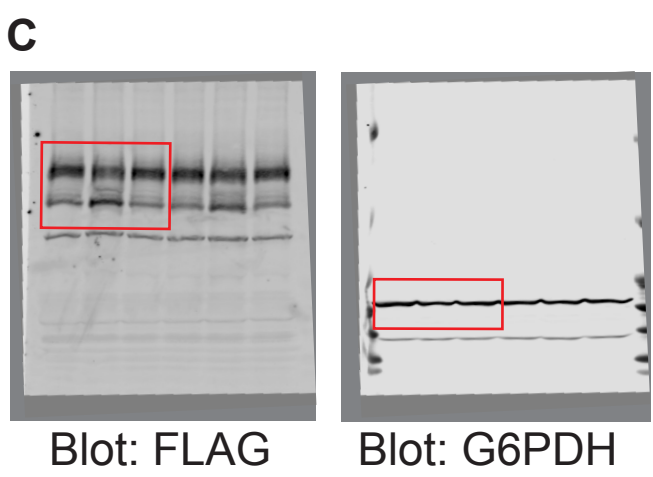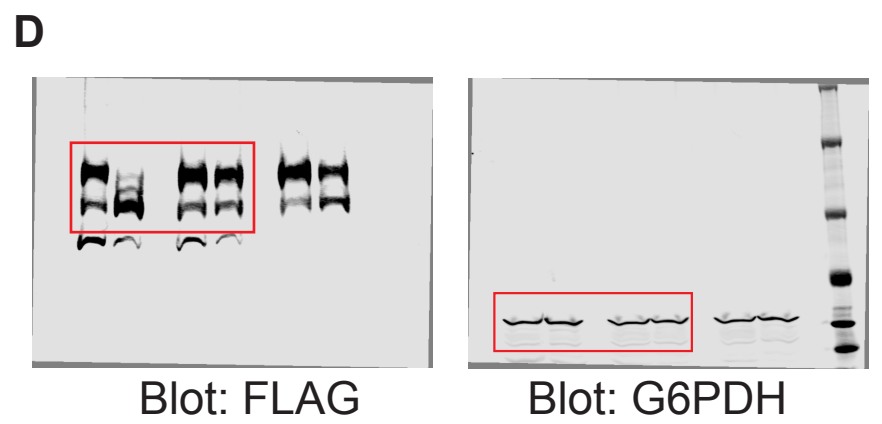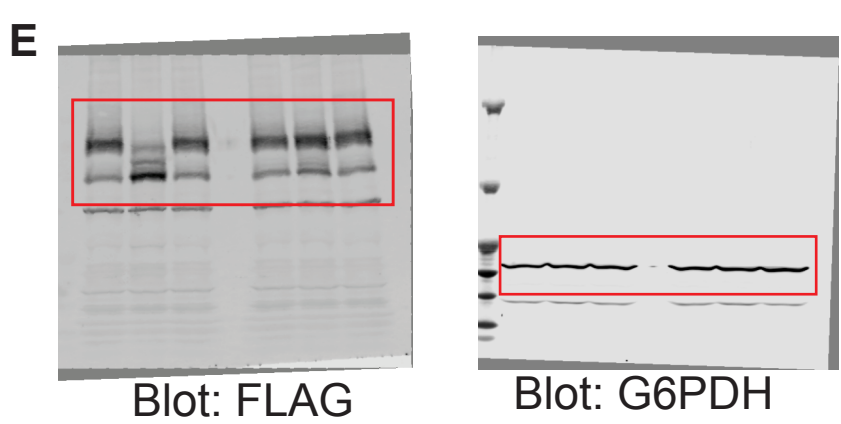

**Figure 6-figure supplement 1**
