# Supplementary material for: Adaptor linked K63 di-ubiquitin activates Nedd4/Rsp5 E3 ligase
Source: eLife. 2022 Jun 30;11:e77424. doi: 10.7554/eLife.77424 (PMC9282857; doi:10.7554/eLife.77424)
Supplement: Figure 2—figure supplement 1—source data 2. [file elife-77424-fig2-figsupp1-data2.xlsx]

## Sheet: Sheet1
		Mup1-GFP degradation (%)
	Methionine concentration	0 µg/ml	0.5 µg/ml	1 µg/ml	2 µg/ml	4 µg/ml
Replicate 1	art1∆	0.81726	0.812281	0.214937	0.614919	0.122405
	ART1-WT	1.45679	20.316	31.8574	33.6498	50.6889
	art1-K486R	3.31554	3.89234	5.32574	8.52228	9.57444
Replicate 2	art1∆	1.4073	0.708398	1.92365	1.75153	2.53112
	ART1-WT	4.1094	23.6872	27.6924	40.9182	56.7952
	art1-K486R	1.02446	1.39126	3.36336	5.23686	6.2135
Replicate 3	art1∆	3.51602	3.01104	3.02489	4.36025	4.33236
	ART1-WT	1.28932	16.9339	29.7749	31.2093	54.8018
	art1-K486R	1.17622	4.16047	6.87566	10.9294	12.9562
