# Supplementary material for: Adaptor linked K63 di-ubiquitin activates Nedd4/Rsp5 E3 ligase
Source: eLife. 2022 Jun 30;11:e77424. doi: 10.7554/eLife.77424 (PMC9282857; doi:10.7554/eLife.77424)
Supplement: Figure 2—figure supplement 3—source data 2. [file elife-77424-fig2-figsupp3-data2.xlsx]

## Sheet: Sheet1
		Itr1-GFP degradation (%)
	Inositol concentration	0 µg/ml	5 µg/ml	10 µg/ml	20 µg/ml
Replicate 1	art5-K364R	2.36378	10.7996	16.8677	16.9661
	art5-K364R-2xUb	1.14417	8.06	14.163	16.4963
Replicate 2	art5-K364R	3.27051	13.5118	21.7119	29.4583
	art5-K364R-2xUb	3.44264	18.6361	26.7364	30.968
Replicate 3	art5-K364R	5.36647	19.5575	27.6578	28.6829
	art5-K364R-2xUb	5.36647	16.5931	25.3897	28.8512
