# Supplementary material for: Adaptor linked K63 di-ubiquitin activates Nedd4/Rsp5 E3 ligase
Source: eLife. 2022 Jun 30;11:e77424. doi: 10.7554/eLife.77424 (PMC9282857; doi:10.7554/eLife.77424)
Supplement: Figure 2—figure supplement 3—source data 3. [file elife-77424-fig2-figsupp3-data3.xlsx]

## Sheet: Sheet1
		Itr1-GFP degradation (%)
	Inositol concentration	0 µg/ml	5 µg/ml	10 µg/ml	20 µg/ml
Replicate 1	art5-∆PY	0.912477	0.96317	0.902338	1.11525
	art5-∆PY-2xUb	0.608318	0.81109	0.709704	1.11525
Replicate 2	art5-∆PY	4.56238	4.96793	1.59177	2.12911
	art5-∆PY-2xUb	1.52079	1.41941	4.461	4.66377
Replicate 3	art5-∆PY	0.912477	0.790813	4.95779	4.99835
	art5-∆PY-2xUb	5.1707	4.86654	1.41941	1.72357
