# Supplementary material for: Adaptor linked K63 di-ubiquitin activates Nedd4/Rsp5 E3 ligase
Source: eLife. 2022 Jun 30;11:e77424. doi: 10.7554/eLife.77424 (PMC9282857; doi:10.7554/eLife.77424)
Supplement: Figure 2—source data 2. [file elife-77424-fig2-data2.xlsx]

## Sheet: Sheet1
		Itr1-GFP degradation (%)
	Inositol concentration	0 µg/ml	5 µg/ml	10 µg/ml	20 µg/ml
Replicate 1	art5∆	1.34132	2.17334	1.47406	1.30285
	ART5-WT	12.7998	39.9711	70.5222	92.1536
	art5-K364R	1.23401	8.82908	17.2553	17.7809
Replicate 2	art5∆	2.76552	2.71115	3.94167	3.40144
	ART5-WT	19.9685	52.6423	80.8242	81.4345
	art5-K364R	3.74158	17.4974	24.9105	28.6221
Replicate 3	art5∆	4.10244	4.88407	5.41569	4.70429
	ART5-WT	21.7099	47.8122	76.2957	86.739
	art5-K364R	5.08285	17.9996	24.3837	25.9233
