# Supplementary material for: Adaptor linked K63 di-ubiquitin activates Nedd4/Rsp5 E3 ligase
Source: eLife. 2022 Jun 30;11:e77424. doi: 10.7554/eLife.77424 (PMC9282857; doi:10.7554/eLife.77424)
Supplement: Figure 3—figure supplement 1—source data 1. [file elife-77424-fig3-figsupp1-data1.xlsx]

## Sheet: Sheet1
	Mean value of Art1 PM recruitment (%)			SD of Art1 PM recruitment (%)
Condition	Minimal media	Rich media	+ Methionine	Minimal media	Rich media	+ Methionine
ART1 (WT)	12.6447	37.8223	38.6056	1.97784	4.17543	4.72483
art1(K486R)	2.57371	6.82592	6.93782	0.988918	1.31856	1.42844
art1∆PY	1.7904	2.0142	1.9023	1.0988	0.988918	1.31856
