# Supplementary material for: Adaptor linked K63 di-ubiquitin activates Nedd4/Rsp5 E3 ligase
Source: eLife. 2022 Jun 30;11:e77424. doi: 10.7554/eLife.77424 (PMC9282857; doi:10.7554/eLife.77424)
Supplement: Figure 3—figure supplement 1—source data 2. [file elife-77424-fig3-figsupp1-data2.xlsx]

## Sheet: Sheet1
	Mean value of Rsp5 PM recruitment (%)		SD of Rsp5 PM recruitment (%)
Condition	Minimal media	+Methionine	Minimal media	+Methionine
WT	11.0982	40.8968	1.85634	2.78067
art1-K486R	10.9442	17.1463	1.73544	1.48646
art1-∆PY	11.2074	11.0634	1.45528	1.34435
