# Supplementary material for: Adaptor linked K63 di-ubiquitin activates Nedd4/Rsp5 E3 ligase
Source: eLife. 2022 Jun 30;11:e77424. doi: 10.7554/eLife.77424 (PMC9282857; doi:10.7554/eLife.77424)
Supplement: Figure 3—figure supplement 1—source data 3. [file elife-77424-fig3-figsupp1-data3.xlsx]

## Sheet: Sheet1
Condition	Mean value of Rsp5 PM recruitment (%)	SD of Rsp5 PM recruitment (%)
Vector	12.3691	2.20134
o.e. WT	44.8728	3.23982
o.e. art1-K486R	17.6677	2.93455
o.e. art1-∆PY	12.4992	2.00424
