# Supplementary material for: Adaptor linked K63 di-ubiquitin activates Nedd4/Rsp5 E3 ligase
Source: eLife. 2022 Jun 30;11:e77424. doi: 10.7554/eLife.77424 (PMC9282857; doi:10.7554/eLife.77424)
Supplement: Figure 3—source data 1. [file elife-77424-fig3-data1.xlsx]

## Sheet: Sheet1
	Mean value of Art5 PM recruitment (%)		SD of Art5 PM recruitment (%)
Condition	Minimal media	+ Inositol	Minimal media	+ Inositol
ART5 (WT)	1.78468	46.9525	1.30603	2.54376
art5(K364R)	1.3433	7.14509	0.90963	1.21109
art5∆PY	1.6105	1.8451	1.00592	0.923496
