# Supplementary material for: Adaptor linked K63 di-ubiquitin activates Nedd4/Rsp5 E3 ligase
Source: eLife. 2022 Jun 30;11:e77424. doi: 10.7554/eLife.77424 (PMC9282857; doi:10.7554/eLife.77424)
Supplement: Figure 3—source data 2. [file elife-77424-fig3-data2.xlsx]

## Sheet: Sheet1
	Mean value of Rsp5 PM recruitment (%)		SD of Rsp5 PM recruitment (%)
Condition	Minimal media	+ Inositol	Minimal media	+ Inositol
WT	11.7977	42.6789	2.12707	3.70346
art5-K364R	11.5676	18.5235	2.65357	3.08604
art5-∆PY	11.4563	11.2956	2.98388	3.39804
