# Supplementary material for: Adaptor linked K63 di-ubiquitin activates Nedd4/Rsp5 E3 ligase
Source: eLife. 2022 Jun 30;11:e77424. doi: 10.7554/eLife.77424 (PMC9282857; doi:10.7554/eLife.77424)
Supplement: Figure 3—source data 3. [file elife-77424-fig3-data3.xlsx]

## Sheet: Sheet1
	Mean value of Art5 PM recruitment (%)		SD of Art5 PM recruitment (%)
Condition	Minimal media	+ Inositol	Minimal media	+ Inositol
ITR1	1.78468	46.9525	1.30603	2.54376
itr1∆	1.32019	1.6985	0.93451	1.19099
