# Supplementary material for: Adaptor linked K63 di-ubiquitin activates Nedd4/Rsp5 E3 ligase
Source: eLife. 2022 Jun 30;11:e77424. doi: 10.7554/eLife.77424 (PMC9282857; doi:10.7554/eLife.77424)
Supplement: Figure 6—figure supplement 2—source data 3. [file elife-77424-fig6-figsupp2-data3.xlsx]

## Sheet: Art1
		Fold change of ubiquitinated Art1
	Cell lines	Mock treated	Methionined treated	After wash
Replicate 1	UBP2	1	1.90029	1.16939
	ubp2∆	1	1.21471	1.22754
Replicate 2	UBP2	1	2.08357	1.20076
	ubp2∆	1	1.15166	1.26983
Replicate 3	UBP2	1	1.83979	1.21299
	ubp2∆	1	1.1261	1.39487
