# Supplementary material for: Adaptor linked K63 di-ubiquitin activates Nedd4/Rsp5 E3 ligase
Source: eLife journal article supplement (doi:10.7554/elife.77424), 2022-06-28
Supplement: supp [file elife_poa_e77424_Figure_2_figure_supplement_2_source_data_1.pdf › elife_poa_e77424_Figure_2_figure_supplement_2_source_data_1.pdf]

**A**

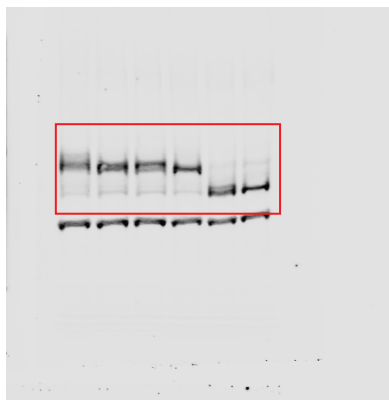

Blot: FLAG

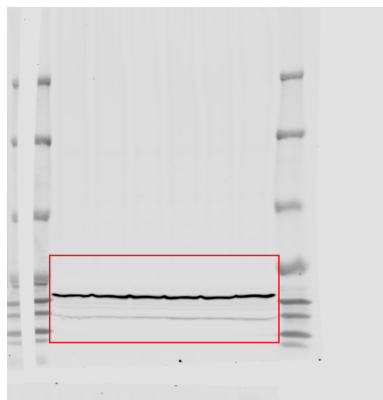

Blot: G6PDH

**B**

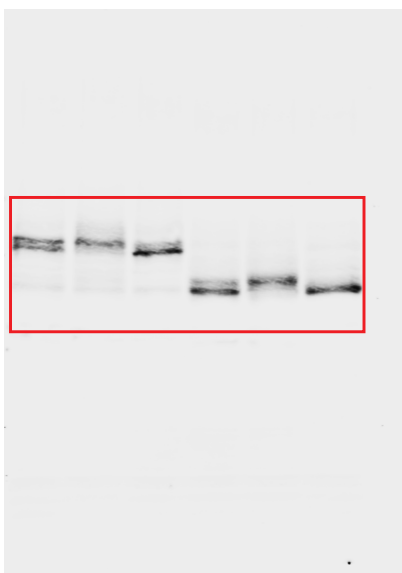

Blot: FLAG

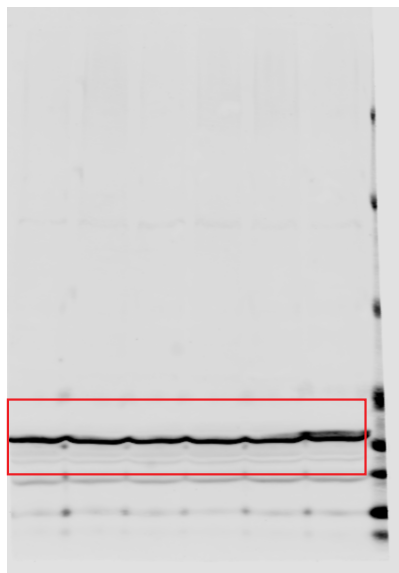

Blot: G6PDH

**Figure 2-figure supplement 2**
