# Supplementary material for: Adaptor linked K63 di-ubiquitin activates Nedd4/Rsp5 E3 ligase
Source: eLife journal article supplement (doi:10.7554/elife.77424), 2022-06-28
Supplement: supp [file elife_poa_e77424_Figure_2_figure_supplement_4_source_data_1.pdf › elife_poa_e77424_Figure_2_figure_supplement_4_source_data_1.pdf]

**A****Art1 mutants***Art1<sup>WT</sup>**art1<sup>ΔPY</sup>**art1<sup>K486R</sup>**Art1<sup>WT</sup>-1xUb**Art1<sup>WT</sup>-2xUb**Art1<sup>WT</sup>-3xUb***Art1 mutants***art1<sup>K486R</sup>-1xUb**art1<sup>K486R</sup>-2xUb**art1<sup>K486R</sup>-3xUb*

0μg/ml

2μg/ml

4μg/ml

**B****Art1 mutants***Art1<sup>WT</sup>**art1<sup>ΔPY</sup>**art1<sup>ΔPY</sup>-1xUb**art1<sup>ΔPY</sup>-2xUb**art1<sup>ΔPY</sup>-3xUb*

0μg/ml

2μg/ml

4μg/ml

**Figure 2-figure supplement 4**
