# Supplementary material for: Adaptor linked K63 di-ubiquitin activates Nedd4/Rsp5 E3 ligase
Source: eLife journal article supplement (doi:10.7554/elife.77424), 2022-06-28
Supplement: supp [file elife_poa_e77424_Figure_4_source_data_1.pdf › elife_poa_e77424_Figure_4_source_data_1.pdf]

**A**

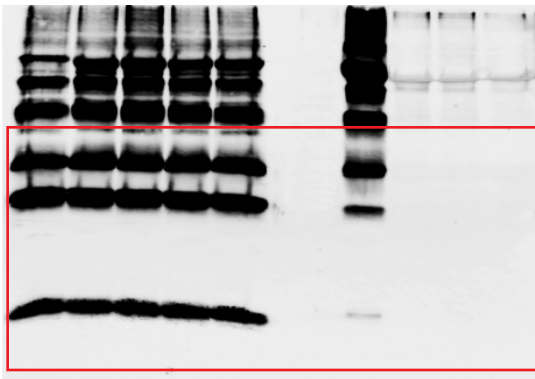

**Blot: 6xHis**

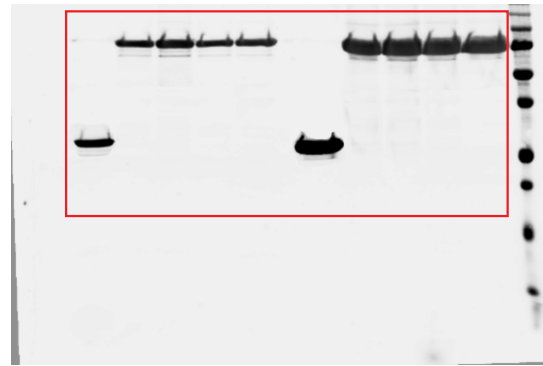

**Blot: GST**

**E**

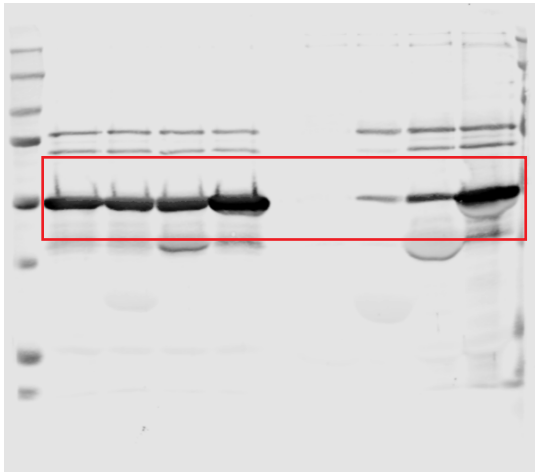

**Blot: Rsp5**

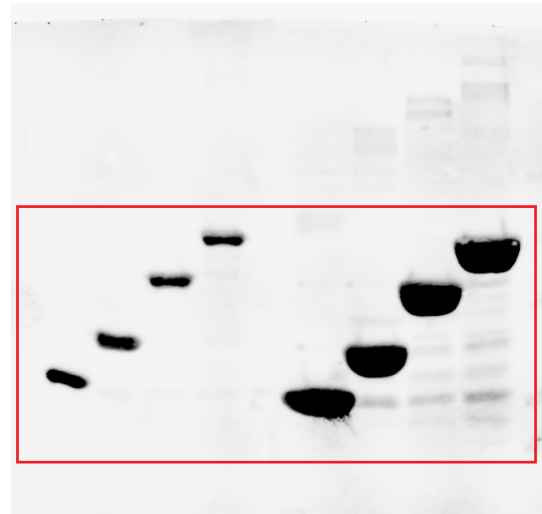

**Blot: GST**

**Figure 4**
