# Supplementary material for: Adaptor linked K63 di-ubiquitin activates Nedd4/Rsp5 E3 ligase
Source: eLife journal article supplement (doi:10.7554/elife.77424), 2022-06-28
Supplement: supp [file elife_poa_e77424_Figure_6_source_data_1.pdf › elife_poa_e77424_Figure_6_source_data_1.pdf]

**A**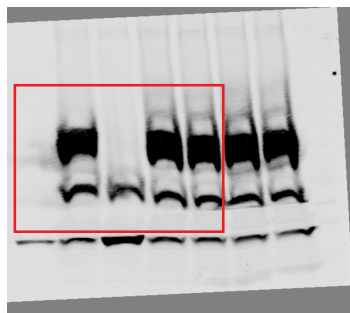

Blot: HA

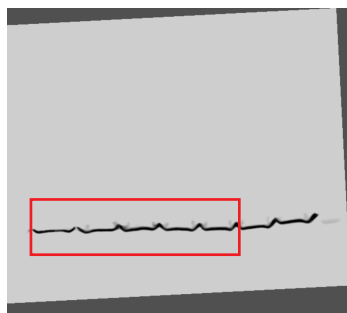

Blot: G6PDH

**B**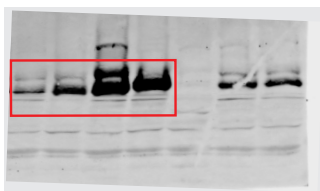

Blot: HA

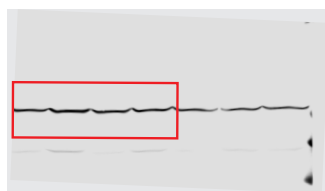

Blot: G6PDH

**C**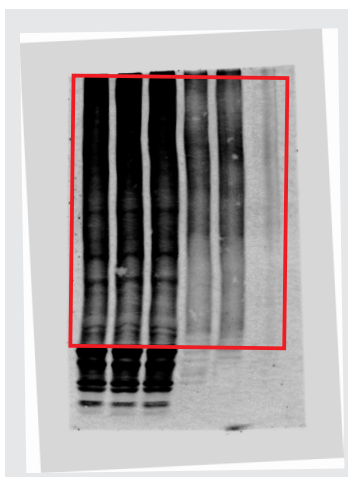

Blot: Myc

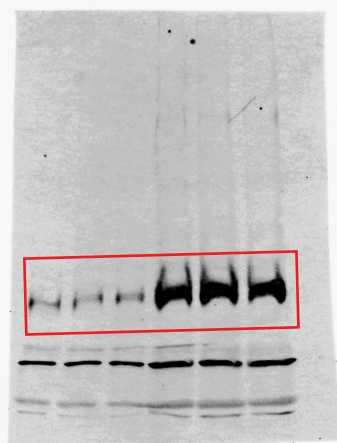

Blot: HA

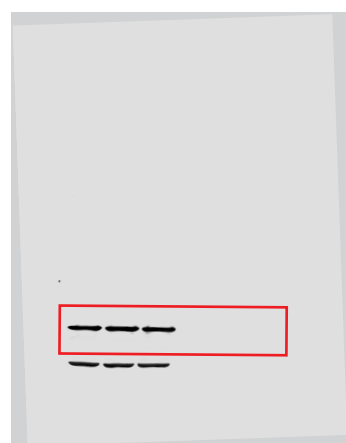

Blot: G6PDH

**D**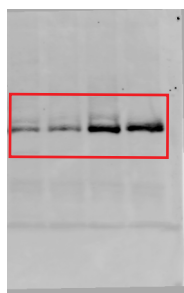

Blot: HA

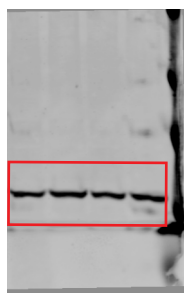

Blot: G6PDH

**Figure 6**
