# Supplementary material for: Adaptor linked K63 di-ubiquitin activates Nedd4/Rsp5 E3 ligase
Source: eLife journal article supplement (doi:10.7554/elife.77424), 2022-06-28
Supplement: supp [file Figure 3-figure supplement 1H.xlsx]

## Sheet: Sheet1
Condition	Mean value of Rsp5 PM recruitment (%)	SD of Rsp5 PM recruitment (%)
Vector	12.3691	2.20134
o.e. WT	44.8728	3.23982
o.e. art1-K486R	17.6677	2.93455
o.e. art1-∆PY	12.4992	2.00424
