# Supplementary material for: Adaptor linked K63 di-ubiquitin activates Nedd4/Rsp5 E3 ligase
Source: eLife journal article supplement (doi:10.7554/elife.77424), 2022-06-28
Supplement: supp [file Figure 3-figure supplement 2B.xlsx]

## Sheet: Sheet1
	Mean value of Art1 PM recruitment (%)		SD of Art1 PM recruitment (%)
Condition	Minimal media	+ Methionine	Minimal media	+ Methionine
MUP1	10.767	35.0504	2.92695	3.24055
mup1∆	7.18703	7.07724	2.45498	1.98581
mup1-Q49R	9.33965	9.57054	2.03758	1.65402
