# Supplementary material for: Adaptor linked K63 di-ubiquitin activates Nedd4/Rsp5 E3 ligase
Source: eLife journal article supplement (doi:10.7554/elife.77424), 2022-06-28
Supplement: supp [file Figure 6-figure supplement 2B.xlsx]

## Sheet: Art5
		Fold change of ubiquitinated Art5
	Cell lines	Mock treated	Inositol treated	After wash
Replicate 1	UBP2	1	3.01641	1.11969
	ubp2∆	1	1.29567	1.55364
Replicate 2	UBP2	1	2.69942	1.14735
	ubp2∆	1	1.38384	1.40795
Replicate 3	UBP2	1	2.67421	1.18544
	ubp2∆	1	1.22939	1.45114
