# Supplementary material for: Adaptor linked K63 di-ubiquitin activates Nedd4/Rsp5 E3 ligase
Source: eLife journal article supplement (doi:10.7554/elife.77424), 2022-06-28
Supplement: supp [file Figure 6-figure supplement 2D.xlsx]

## Sheet: Sheet2
t-Test: Paired Two Sample for Means
	Variable 1	Variable 2
Mean	1	1.16416
Variance	0	0.00208033
Observations	3	3
Pearson Correlation	#DIV/0!
Hypothesized Mean Difference	0
df	2
t Stat	-6.23382
P(T<=t) one-tail	0.0123903
t Critical one-tail	2.91999
P(T<=t) two-tail	0.0247805
t Critical two-tail	4.30265

## Sheet: Art1
		Fold change of ubiquitinated Art1
	Cell lines	Mock treated	Methionined treated	After wash
Replicate 1	UBP2	1	1.90029	1.16939
	ubp2∆	1	1.21471	1.22754
Replicate 2	UBP2	1	2.08357	1.20076
	ubp2∆	1	1.15166	1.26983
Replicate 3	UBP2	1	1.83979	1.21299
	ubp2∆	1	1.1261	1.39487
