# Supplementary figures and images for: Adaptor linked K63 di-ubiquitin activates Nedd4/Rsp5 E3 ligase
Source: eLife journal article supplement (doi:10.7554/elife.77424), 2022-06-28

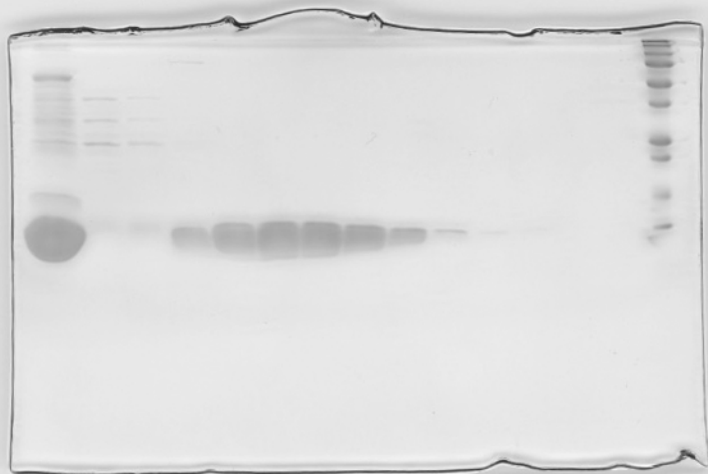

Supplement: supp [file 1-(A) Ub purification.pdf › Source data/Supplementary file 2/1-(A) Ub purification.pdf]

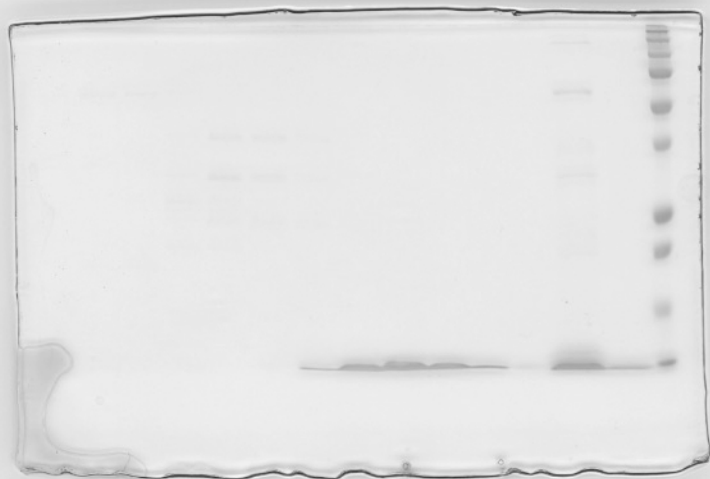

Supplement: supp [file 1-(B) Ub-I44A purification.pdf › Source data/Supplementary file 2/1-(B) Ub-I44A purification.pdf]

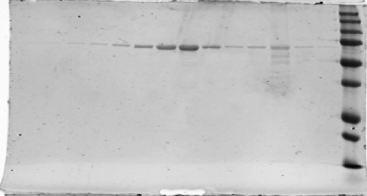

Supplement: supp [file 10-Pub1.pdf › Source data/Supplementary file 2/10-Pub1.pdf]

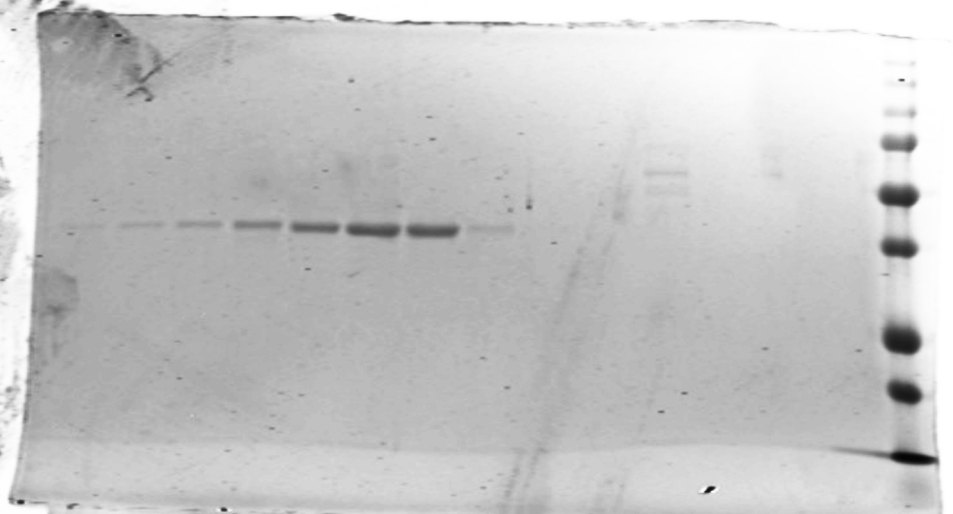

Supplement: supp [file 11-Any1.pdf › Source data/Supplementary file 2/11-Any1.pdf]

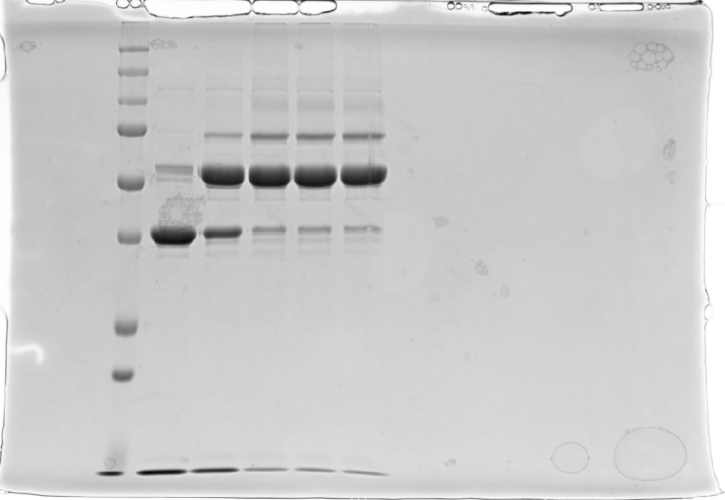

Supplement: supp [file 12-(A) Any1-diUb synthesis.pdf › Source data/Supplementary file 2/12-(A) Any1-diUb synthesis.pdf]

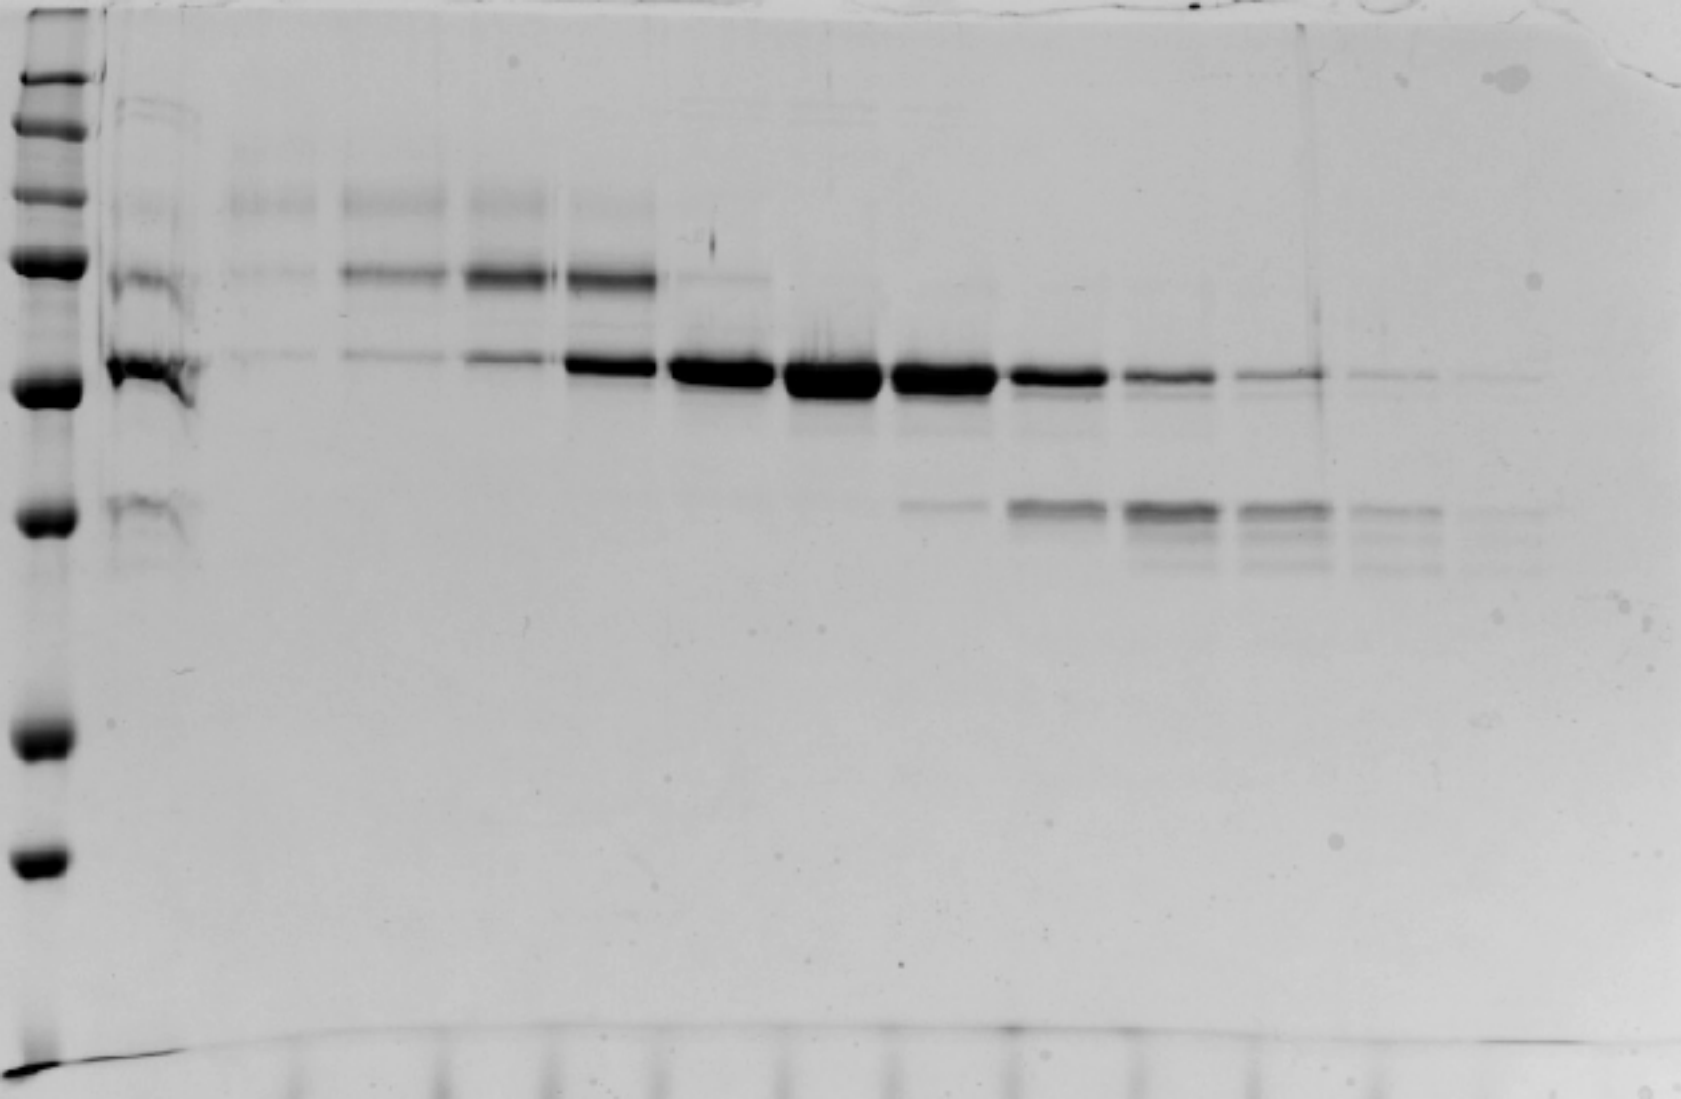

Supplement: supp [file 12-(B) Any1-diUb purification.pdf › Source data/Supplementary file 2/12-(B) Any1-diUb purification.pdf]

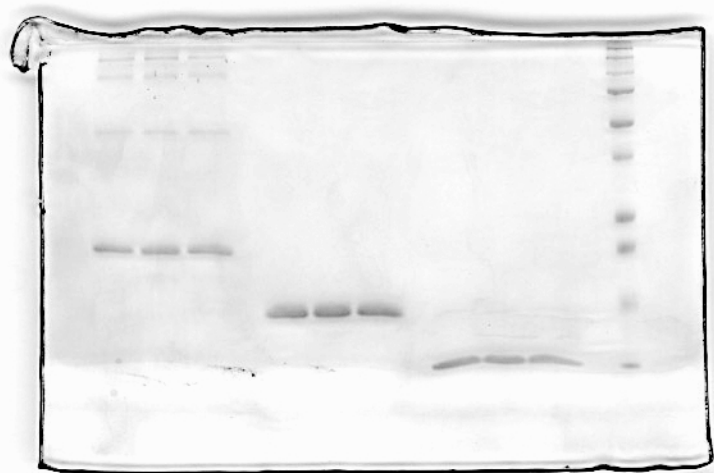

Supplement: supp [file 2-K63 linked di-Ub purification.pdf › Source data/Supplementary file 2/2-K63 linked di-Ub purification.pdf]

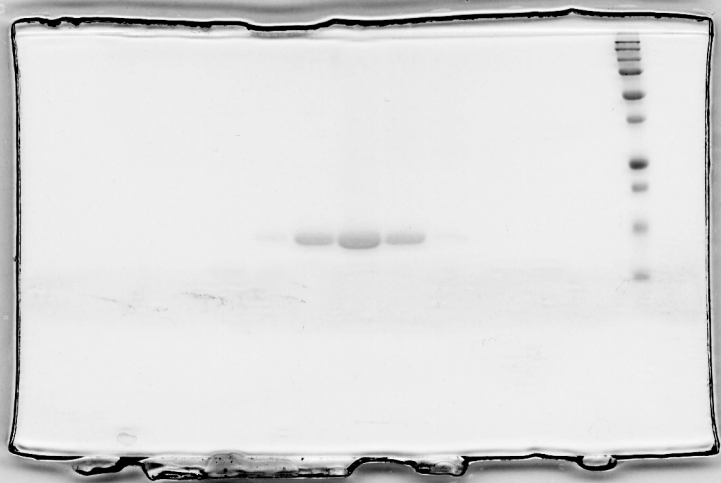

Supplement: supp [file 3-M1 linked di-Ub purification.pdf › Source data/Supplementary file 2/3-M1 linked di-Ub purification.pdf]

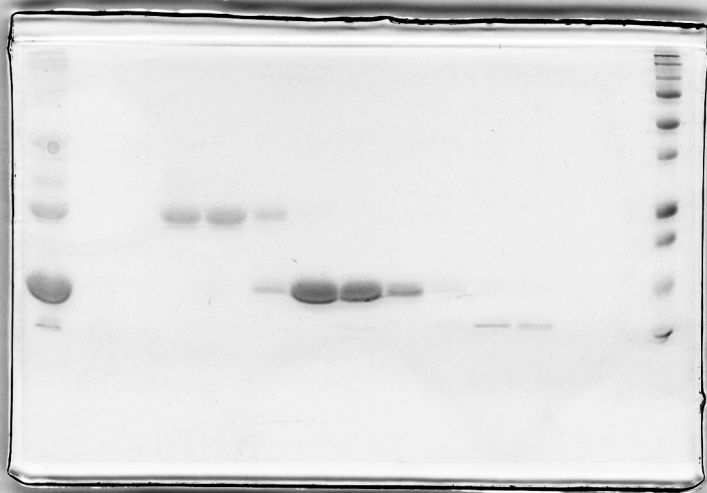

Supplement: supp [file 4-K48 linked di-Ub purification.pdf › Source data/Supplementary file 2/4-K48 linked di-Ub purification.pdf]

C12 D1

D12 E1

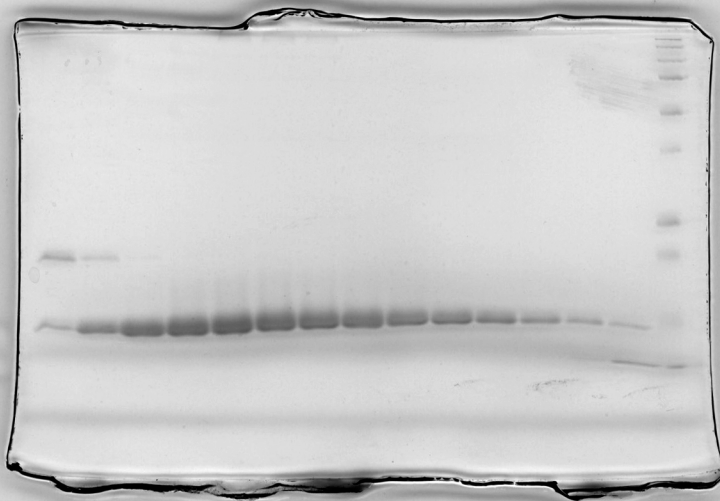

Supplement: supp [file 5-K63 linked di-Ub (Ubwt-UbI44A) purification.pdf › Source data/Supplementary file 2/5-K63 linked di-Ub (Ubwt-UbI44A) purification.pdf]

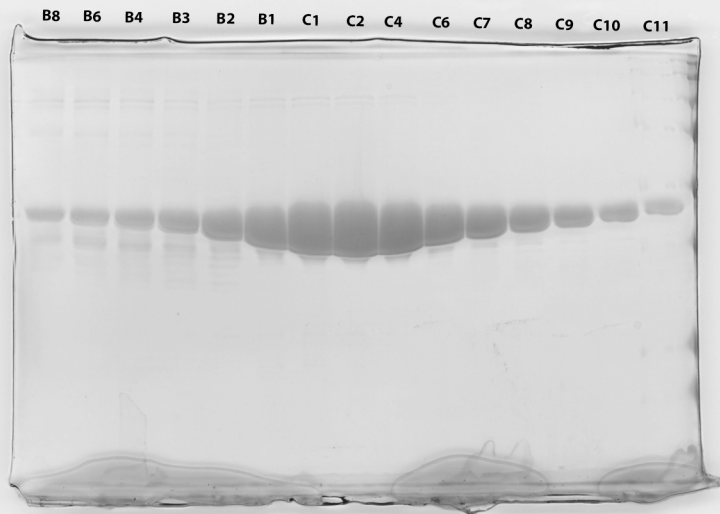

Supplement: supp [file 6-Rsp5 HECT domain purification.pdf › Source data/Supplementary file 2/6-Rsp5 HECT domain purification.pdf]

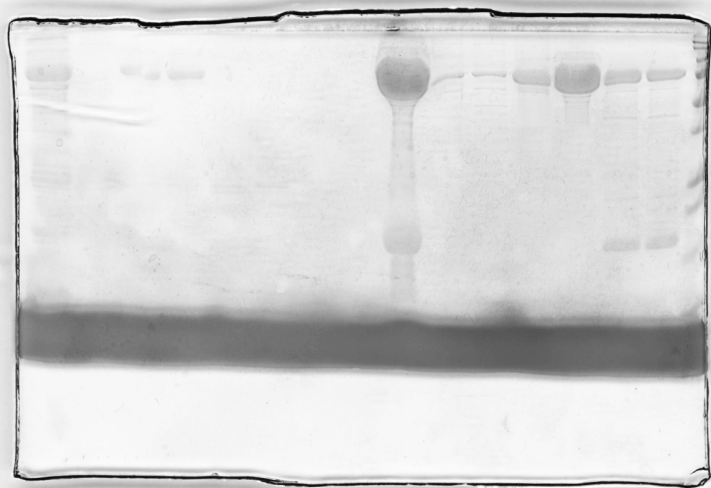

Supplement: supp [file 7-Rsp5 ww1-HECT domain purification.pdf › Source data/Supplementary file 2/7-Rsp5 ww1-HECT domain purification.pdf]

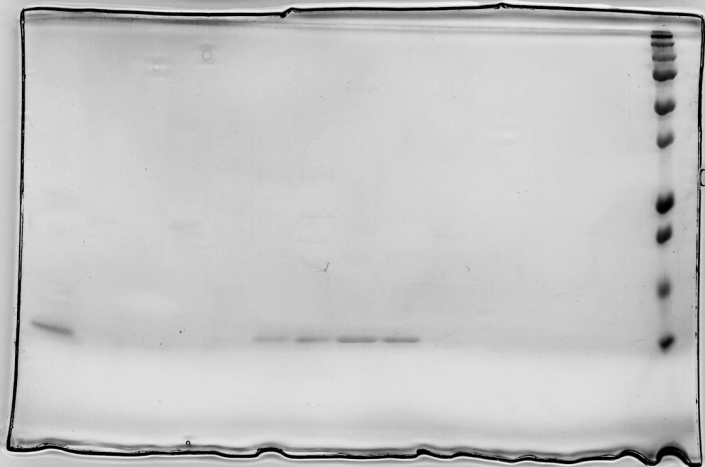

Supplement: supp [file 8-(A) Art1PY-purification.pdf › Source data/Supplementary file 2/8-(A) Art1PY-purification.pdf]

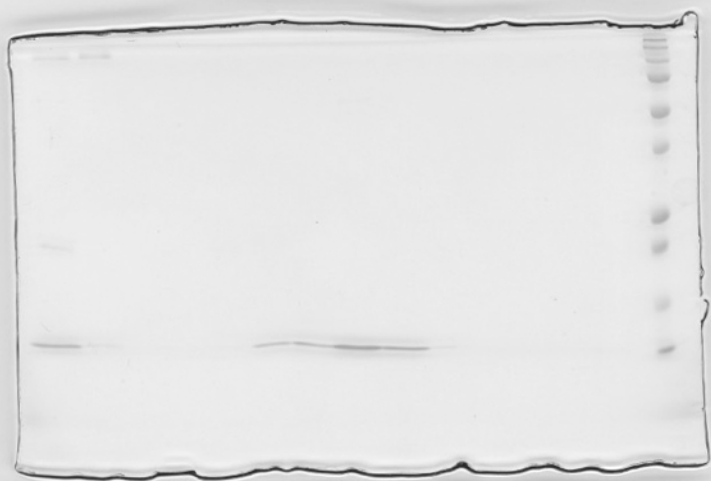

Supplement: supp [file 8-(B) Art1PY mutant-purification.pdf › Source data/Supplementary file 2/8-(B) Art1PY mutant-purification.pdf]

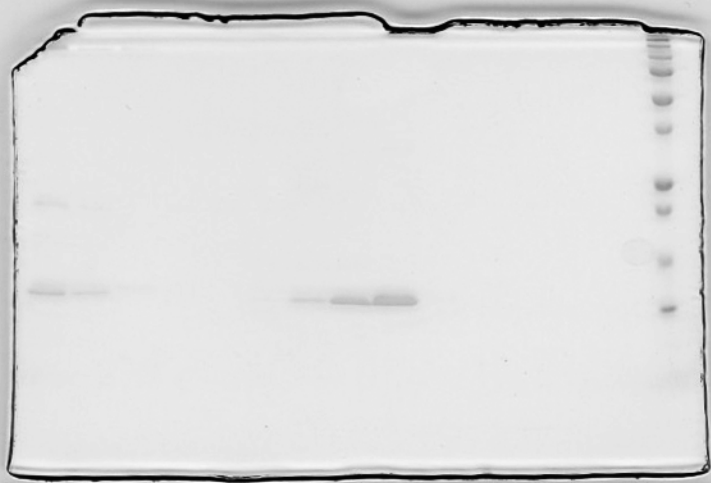

Supplement: supp [file 9-(A) Art5PY-purification.pdf › Source data/Supplementary file 2/9-(A) Art5PY-purification.pdf]

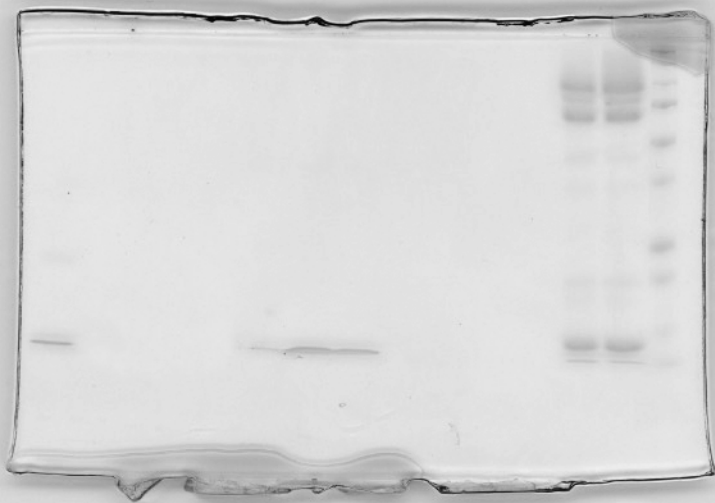

Supplement: supp [file 9-(B) Art5PY mutant-purification.pdf › Source data/Supplementary file 2/9-(B) Art5PY mutant-purification.pdf]

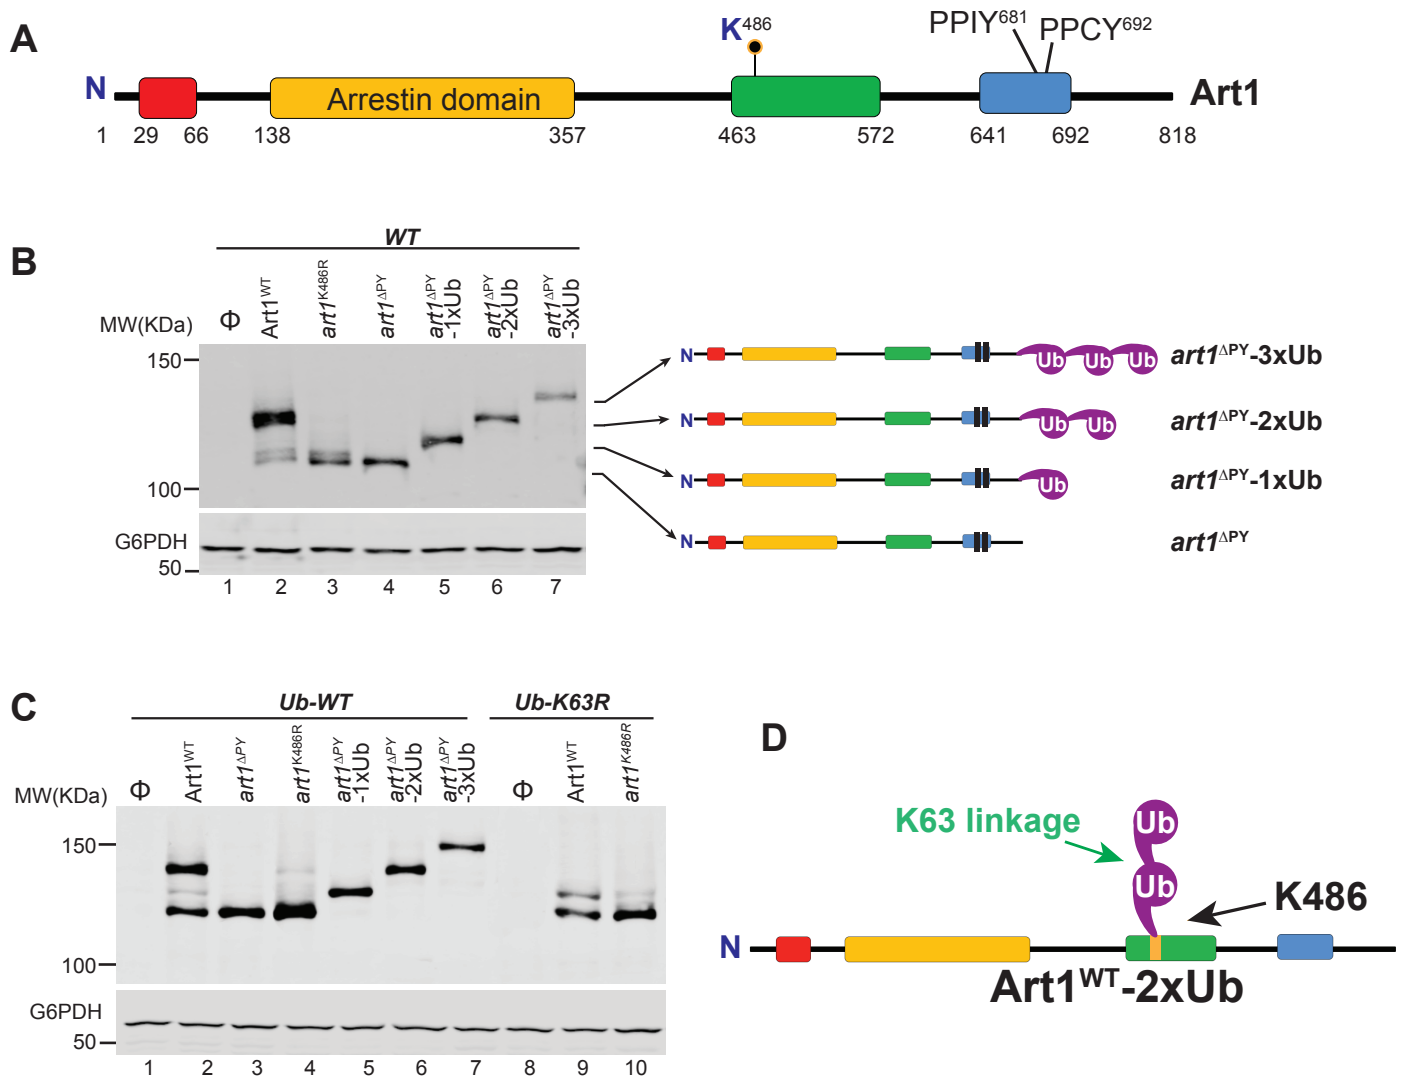

Figure 1-figure supplement 1

Supplement: supp [file elife_poa_e77424_Figure_1_figure_supplement_1.pdf › elife_poa_e77424_Figure_1_figure_supplement_1.pdf]

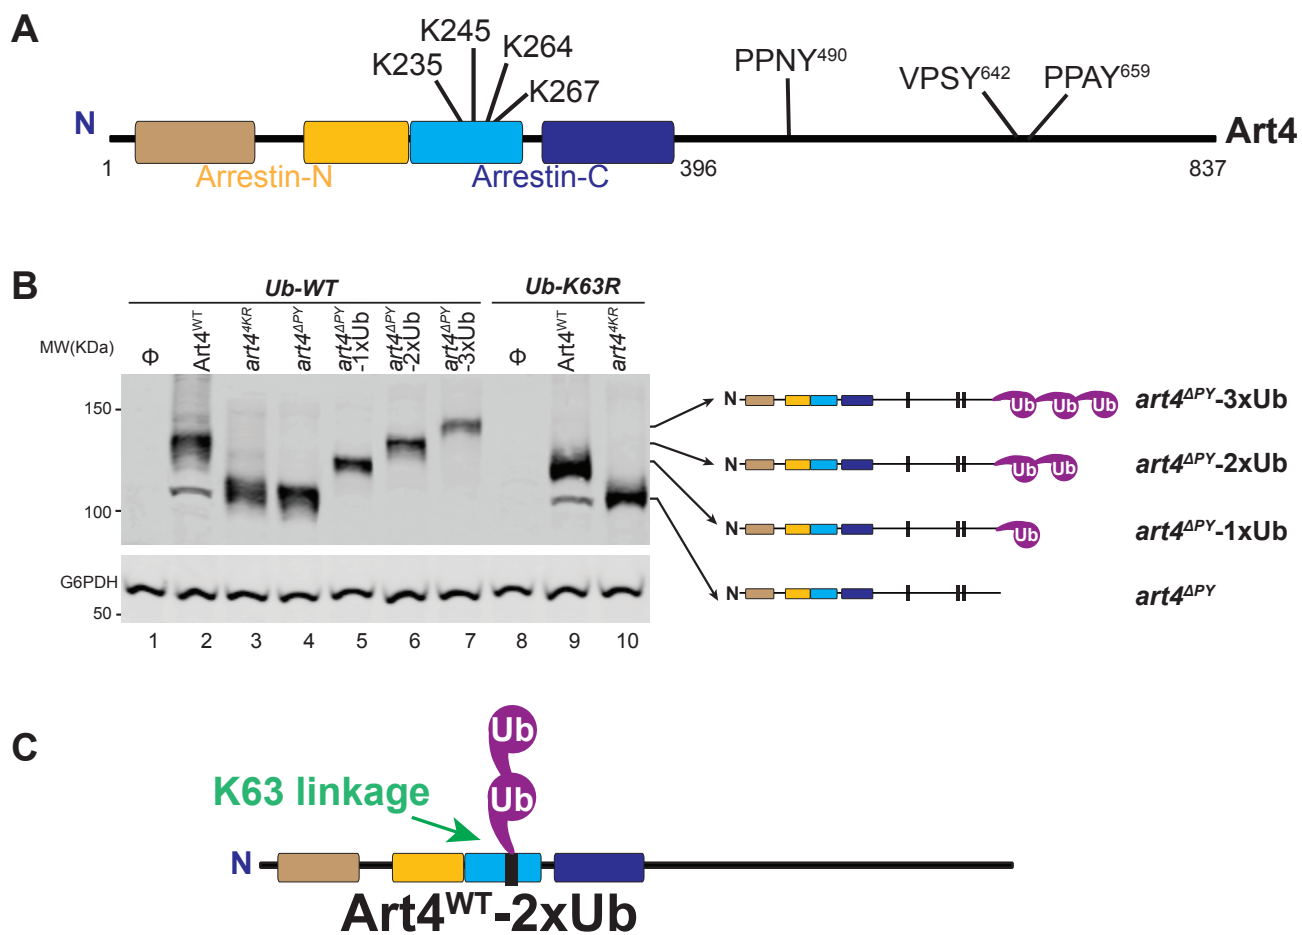

Figure 1-figure supplement 2

Supplement: supp [file elife_poa_e77424_Figure_1_figure_supplement_2.pdf › elife_poa_e77424_Figure_1_figure_supplement_2.pdf]

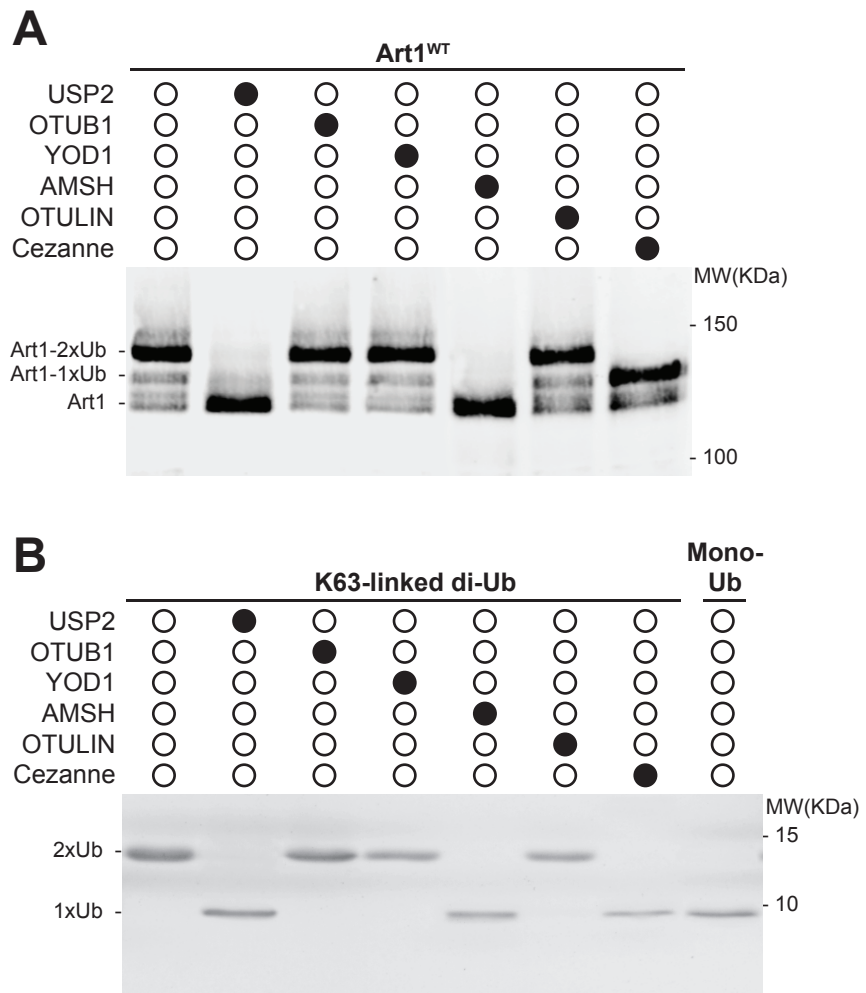

**Figure 1-figure supplement 3**

Supplement: supp [file elife_poa_e77424_Figure_1_figure_supplement_3.pdf › elife_poa_e77424_Figure_1_figure_supplement_3.pdf]

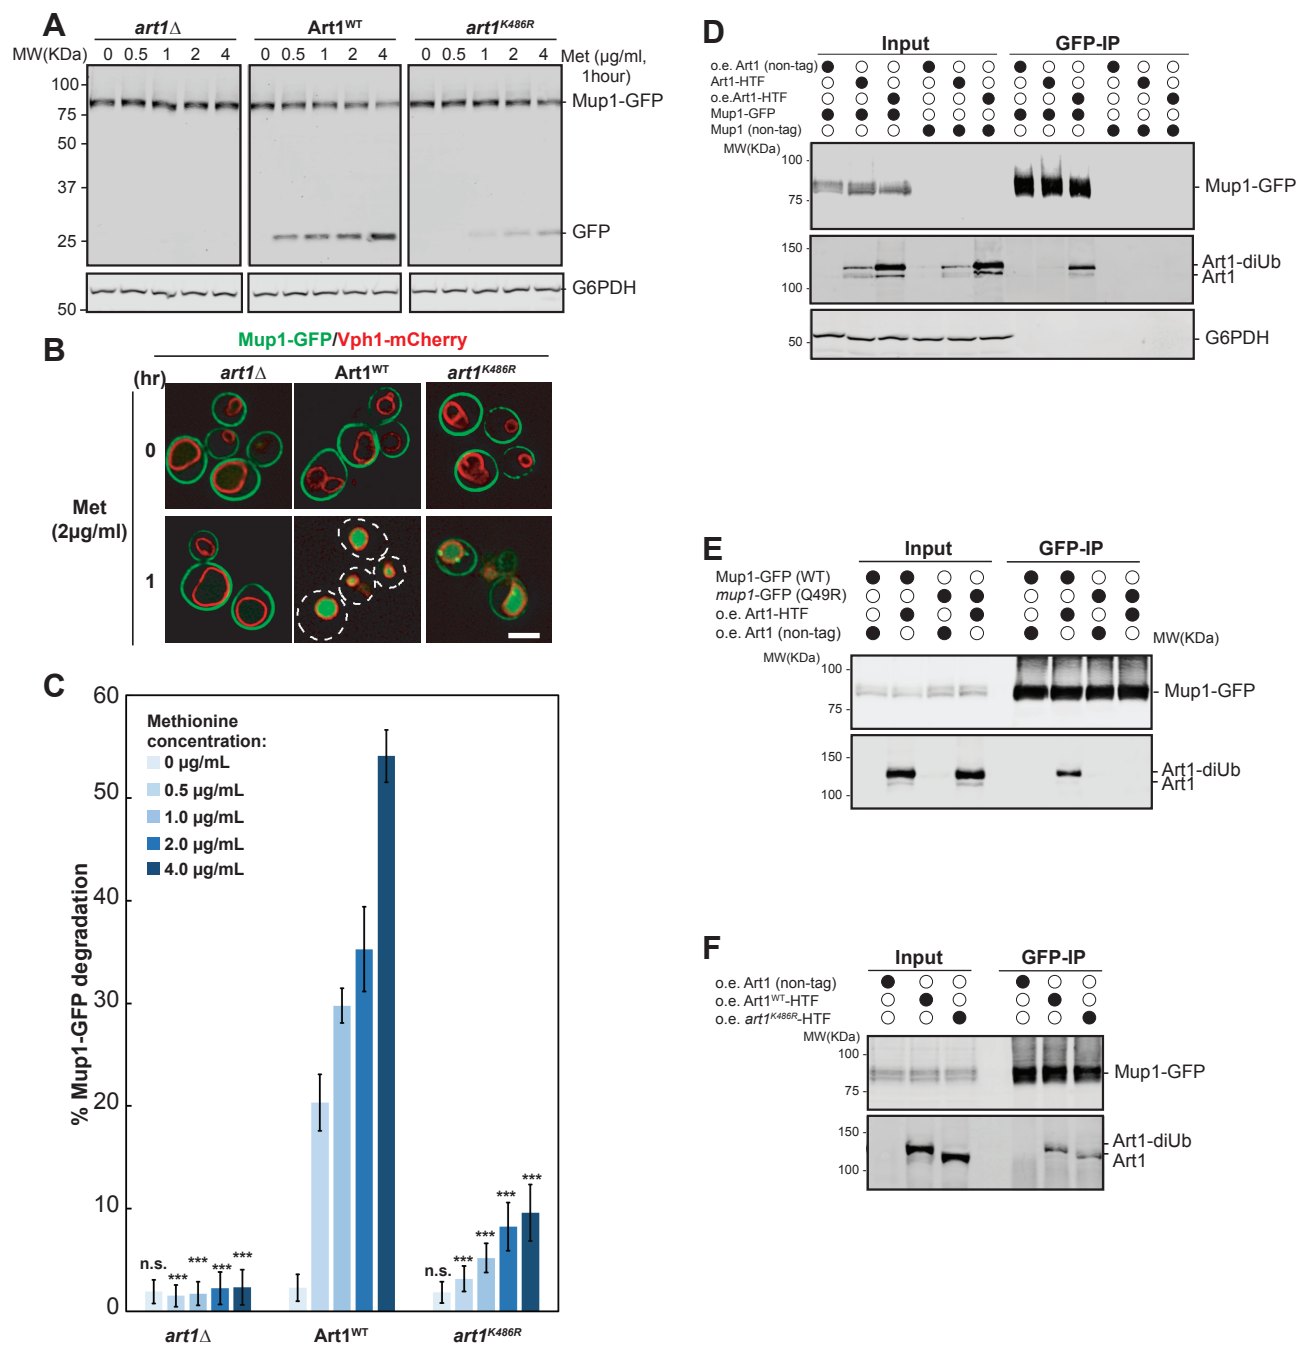

Figure 2-figure supplement 1

Supplement: supp [file elife_poa_e77424_Figure_2_figure_supplement_1.pdf › elife_poa_e77424_Figure_2_figure_supplement_1.pdf]

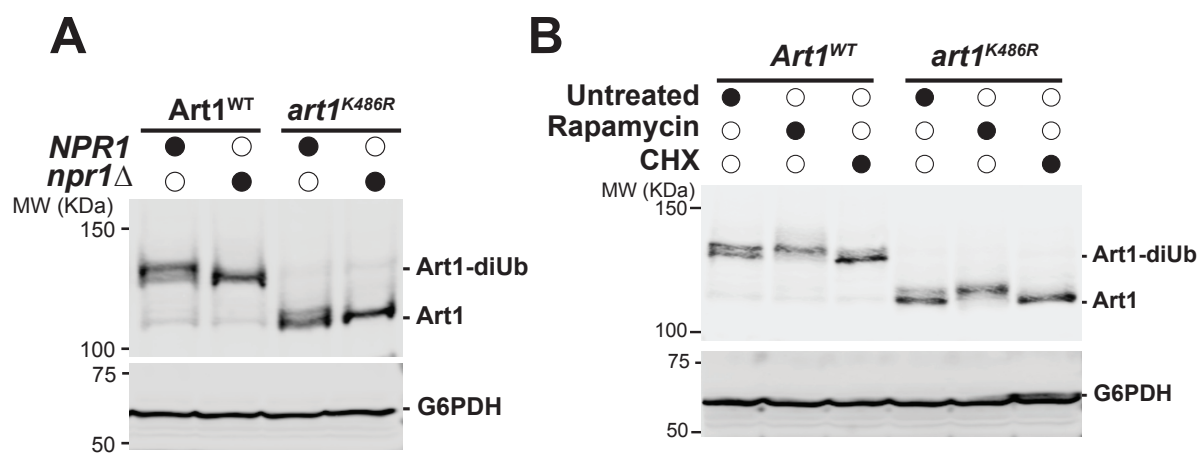

**Figure 2-figure supplement 2**

Supplement: supp [file elife_poa_e77424_Figure_2_figure_supplement_2.pdf › elife_poa_e77424_Figure_2_figure_supplement_2.pdf]

**A**

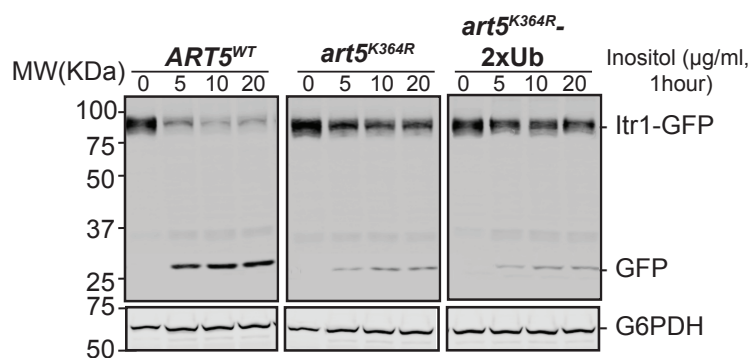

**B**

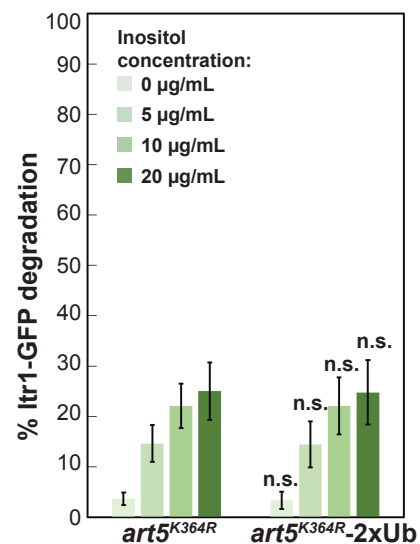

**C**

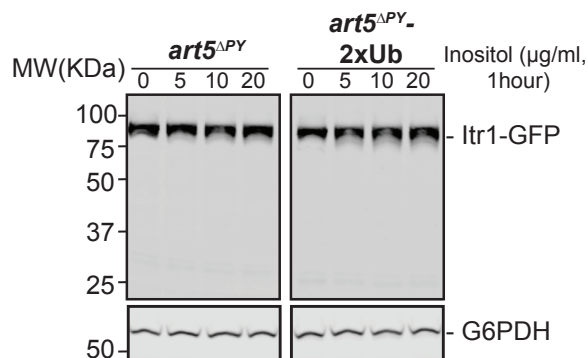

**D**

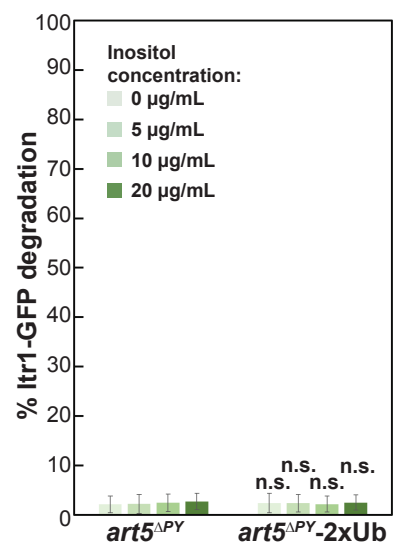

**Figure 2-figure supplement 3**

Supplement: supp [file elife_poa_e77424_Figure_2_figure_supplement_3.pdf › elife_poa_e77424_Figure_2_figure_supplement_3.pdf]

## A

### Art1 mutants

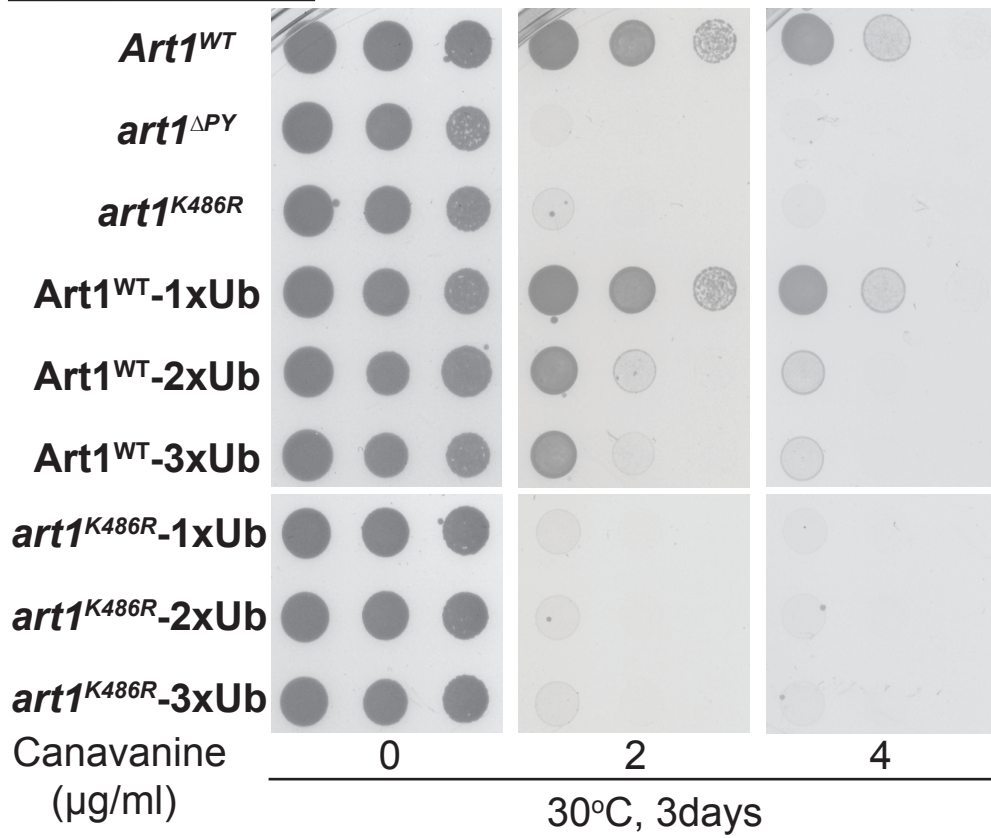

## B

### Art1 mutants

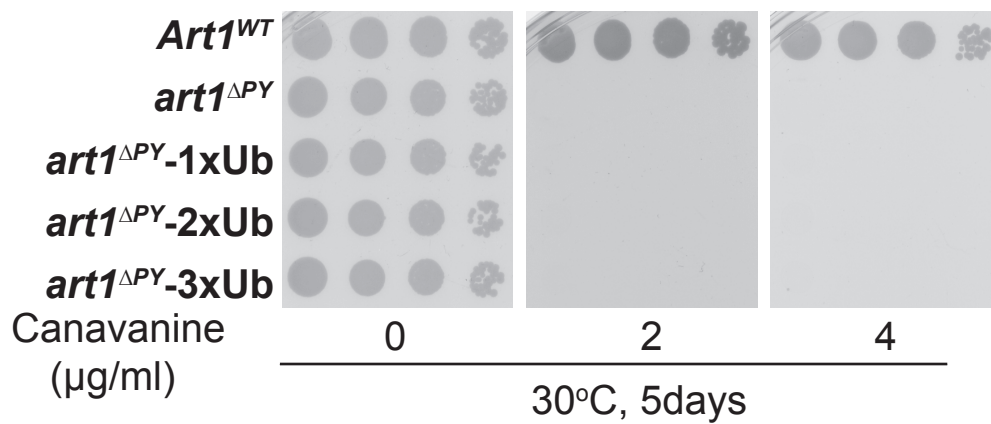

Figure 2-figure supplemental 4

Supplement: supp [file elife_poa_e77424_Figure_2_figure_supplement_4.pdf › elife_poa_e77424_Figure_2_figure_supplement_4.pdf]

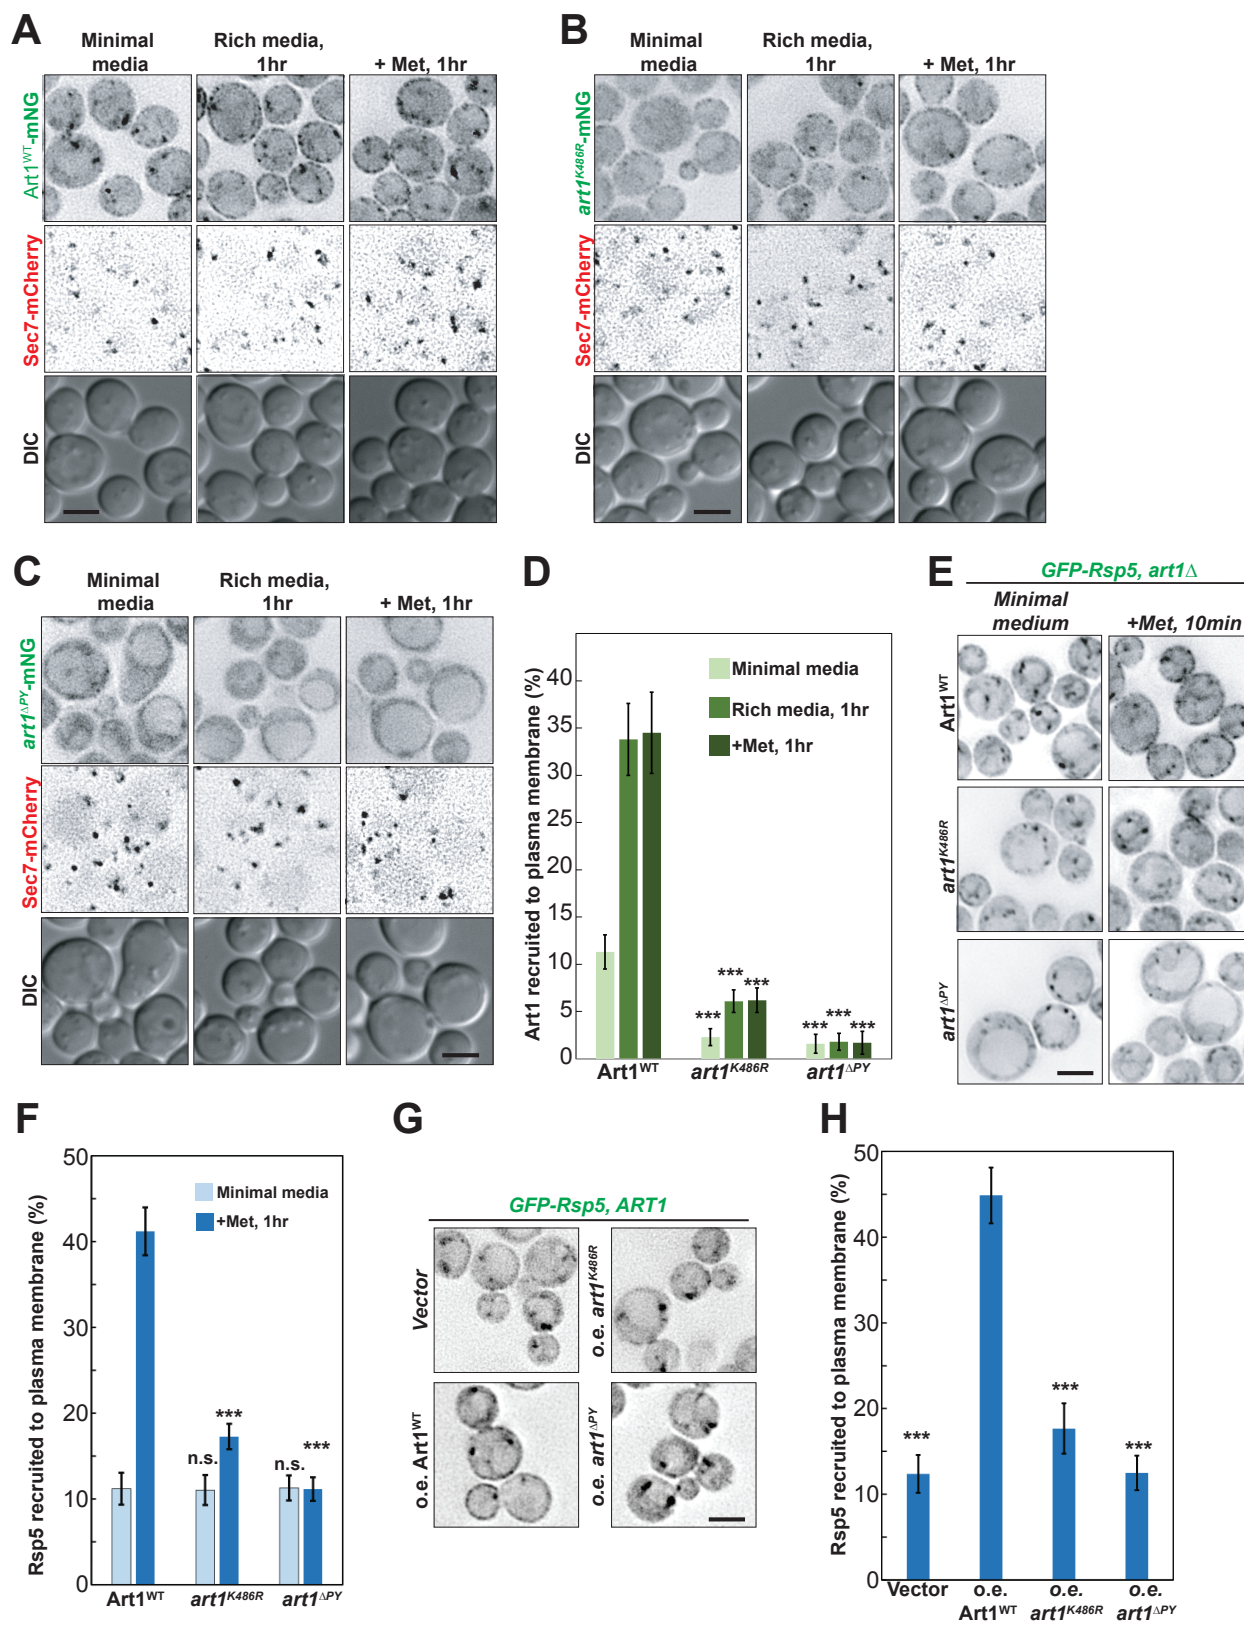

Figure 3-figure supplement 1

Supplement: supp [file elife_poa_e77424_Figure_3_figure_supplement_1.pdf › elife_poa_e77424_Figure_3_figure_supplement_1.pdf]

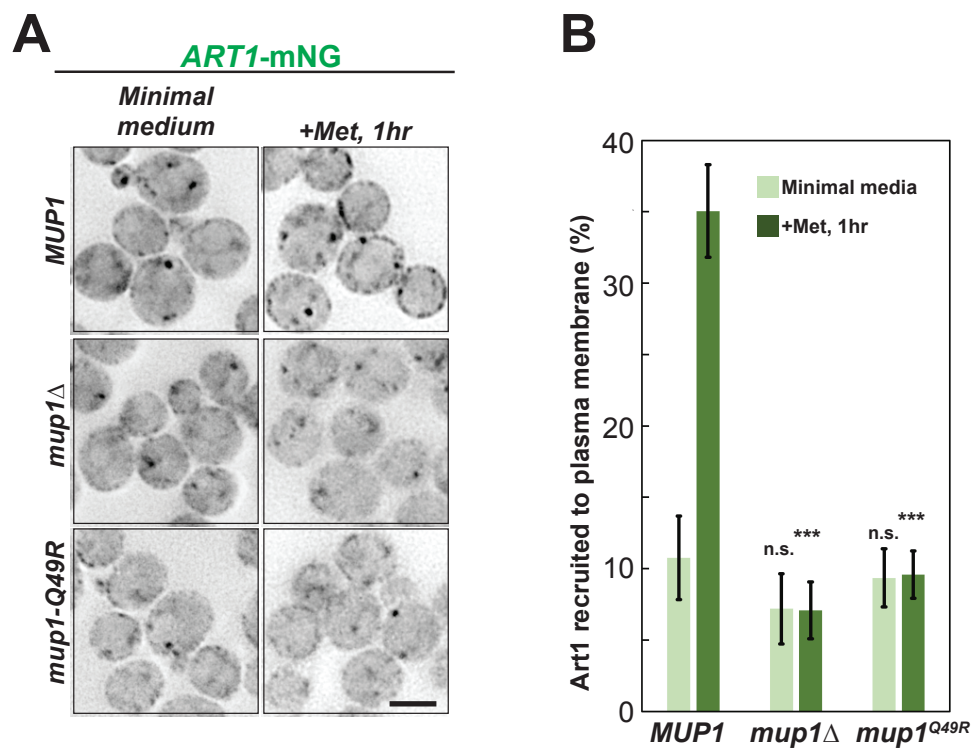

Figure 3-figure supplement 2

Supplement: supp [file elife_poa_e77424_Figure_3_figure_supplement_2.pdf › elife_poa_e77424_Figure_3_figure_supplement_2.pdf]

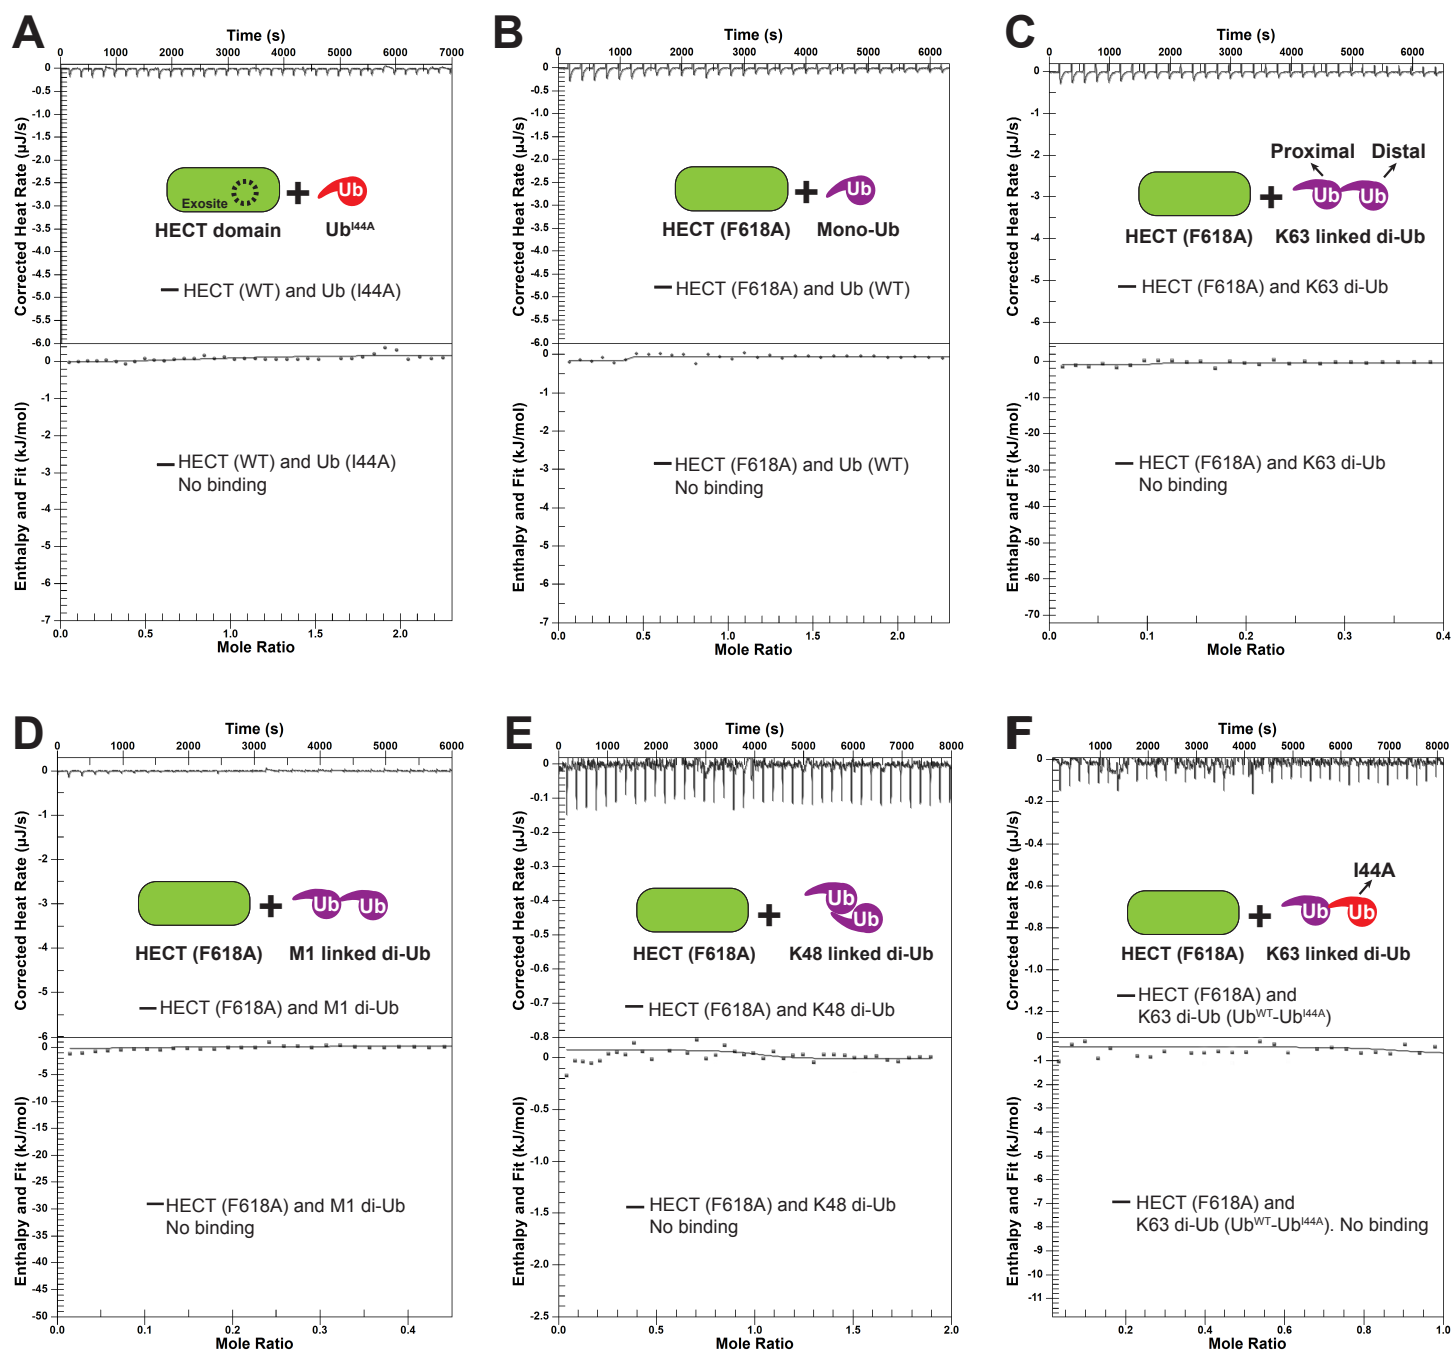

Figure 4-figure supplemental 1

Supplement: supp [file elife_poa_e77424_Figure_4_figure_supplement_1.pdf › elife_poa_e77424_Figure_4_figure_supplement_1.pdf]

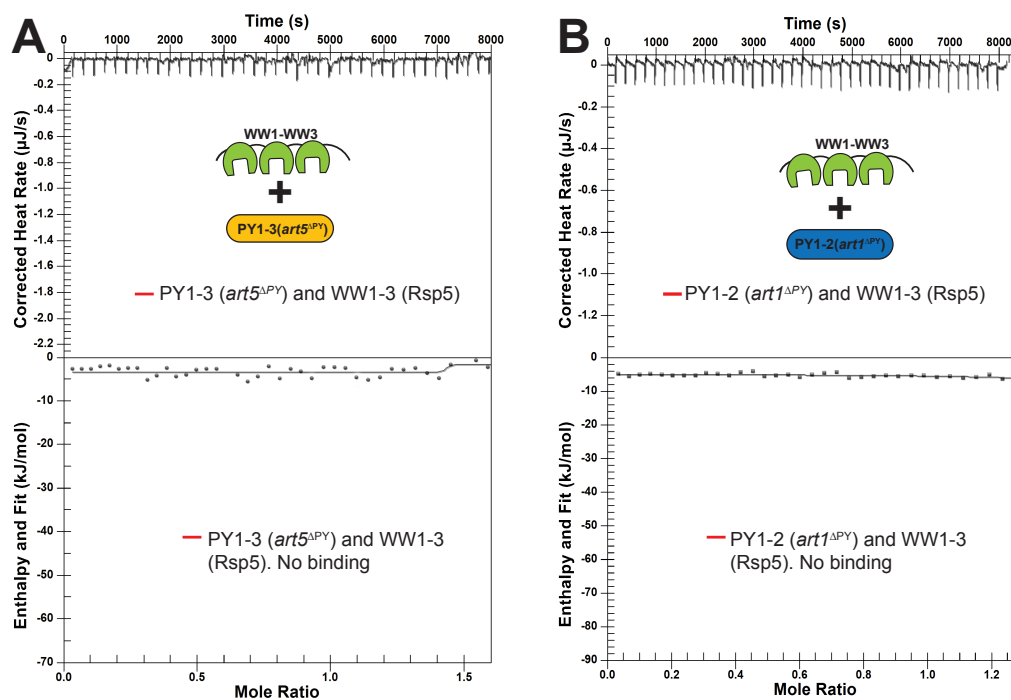

Figure 5-figure supplemental 1

Supplement: supp [file elife_poa_e77424_Figure_5_figure_supplement_1.pdf › elife_poa_e77424_Figure_5_figure_supplement_1.pdf]

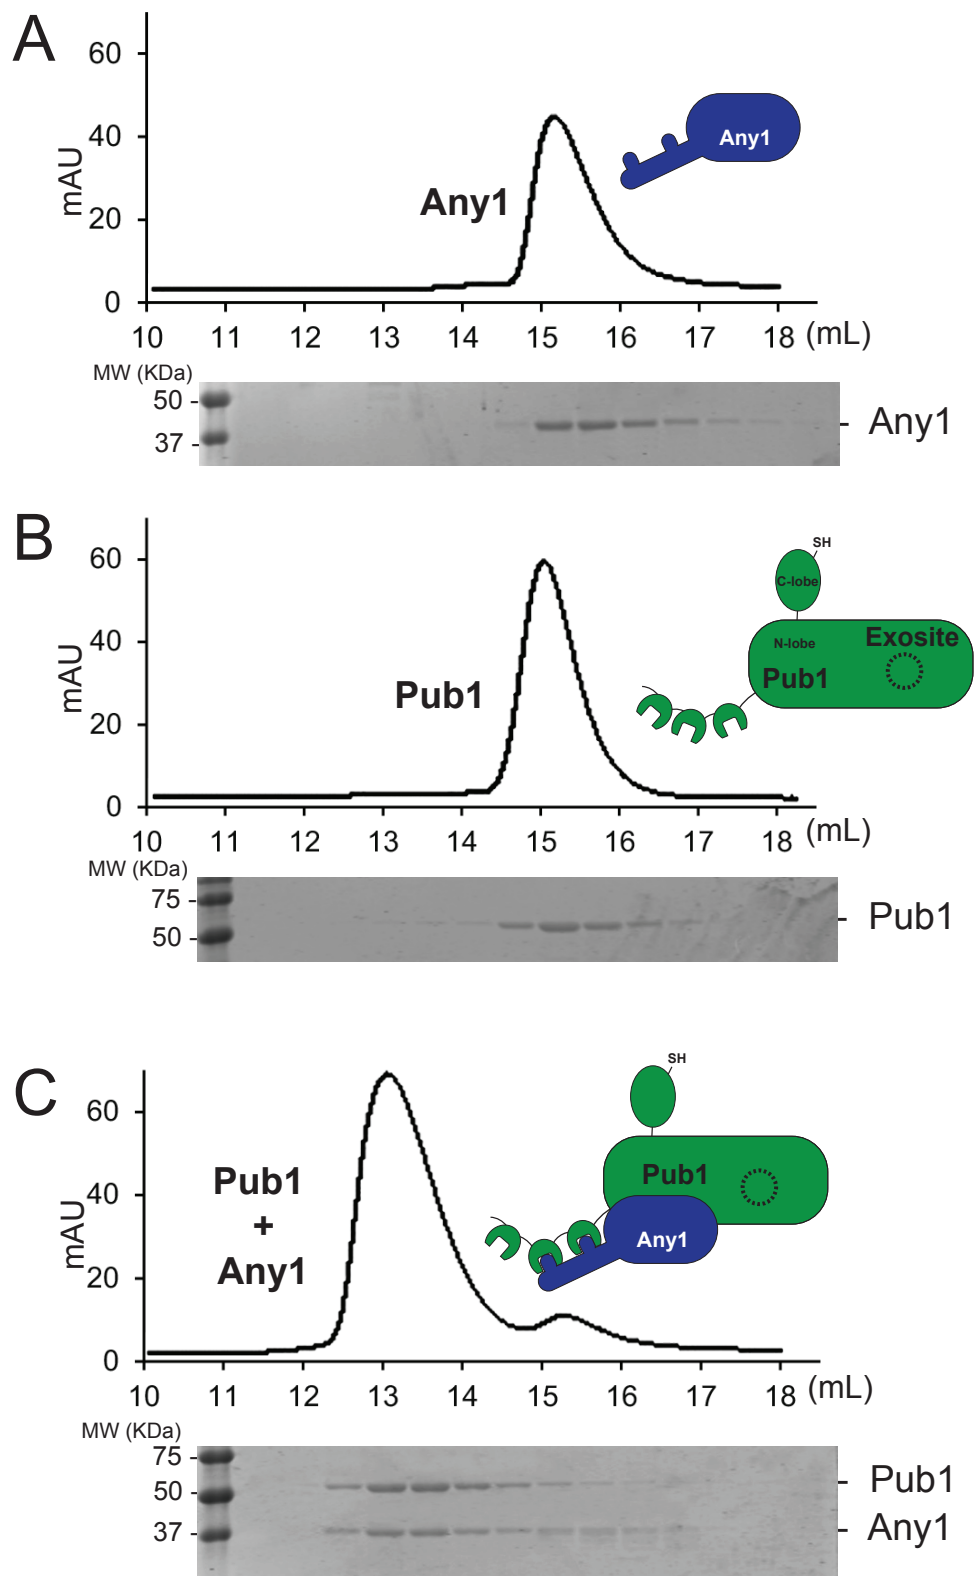

**Figure 5-figure supplement 2**

Supplement: supp [file elife_poa_e77424_Figure_5_figure_supplement_2.pdf › elife_poa_e77424_Figure_5_figure_supplement_2.pdf]

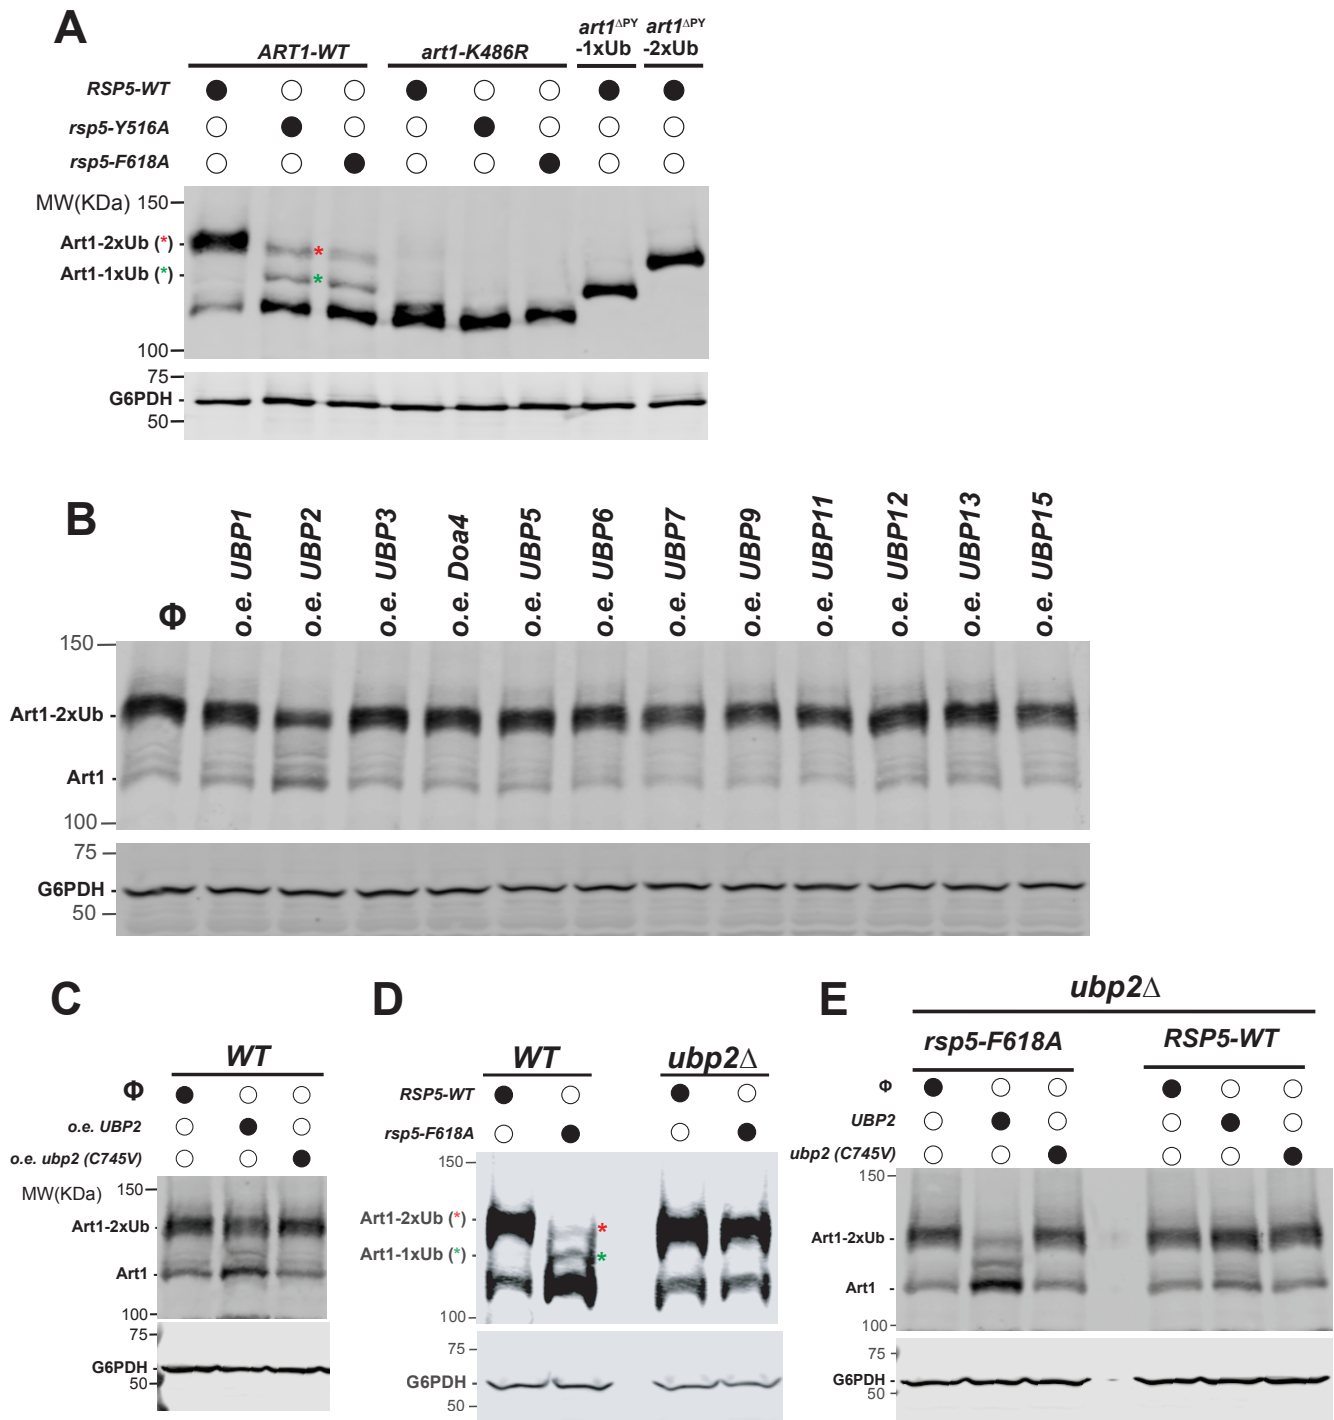

Figure 6-figure supplemental 1

Supplement: supp [file elife_poa_e77424_Figure_6_figure_supplement_1.pdf › elife_poa_e77424_Figure_6_figure_supplement_1.pdf]

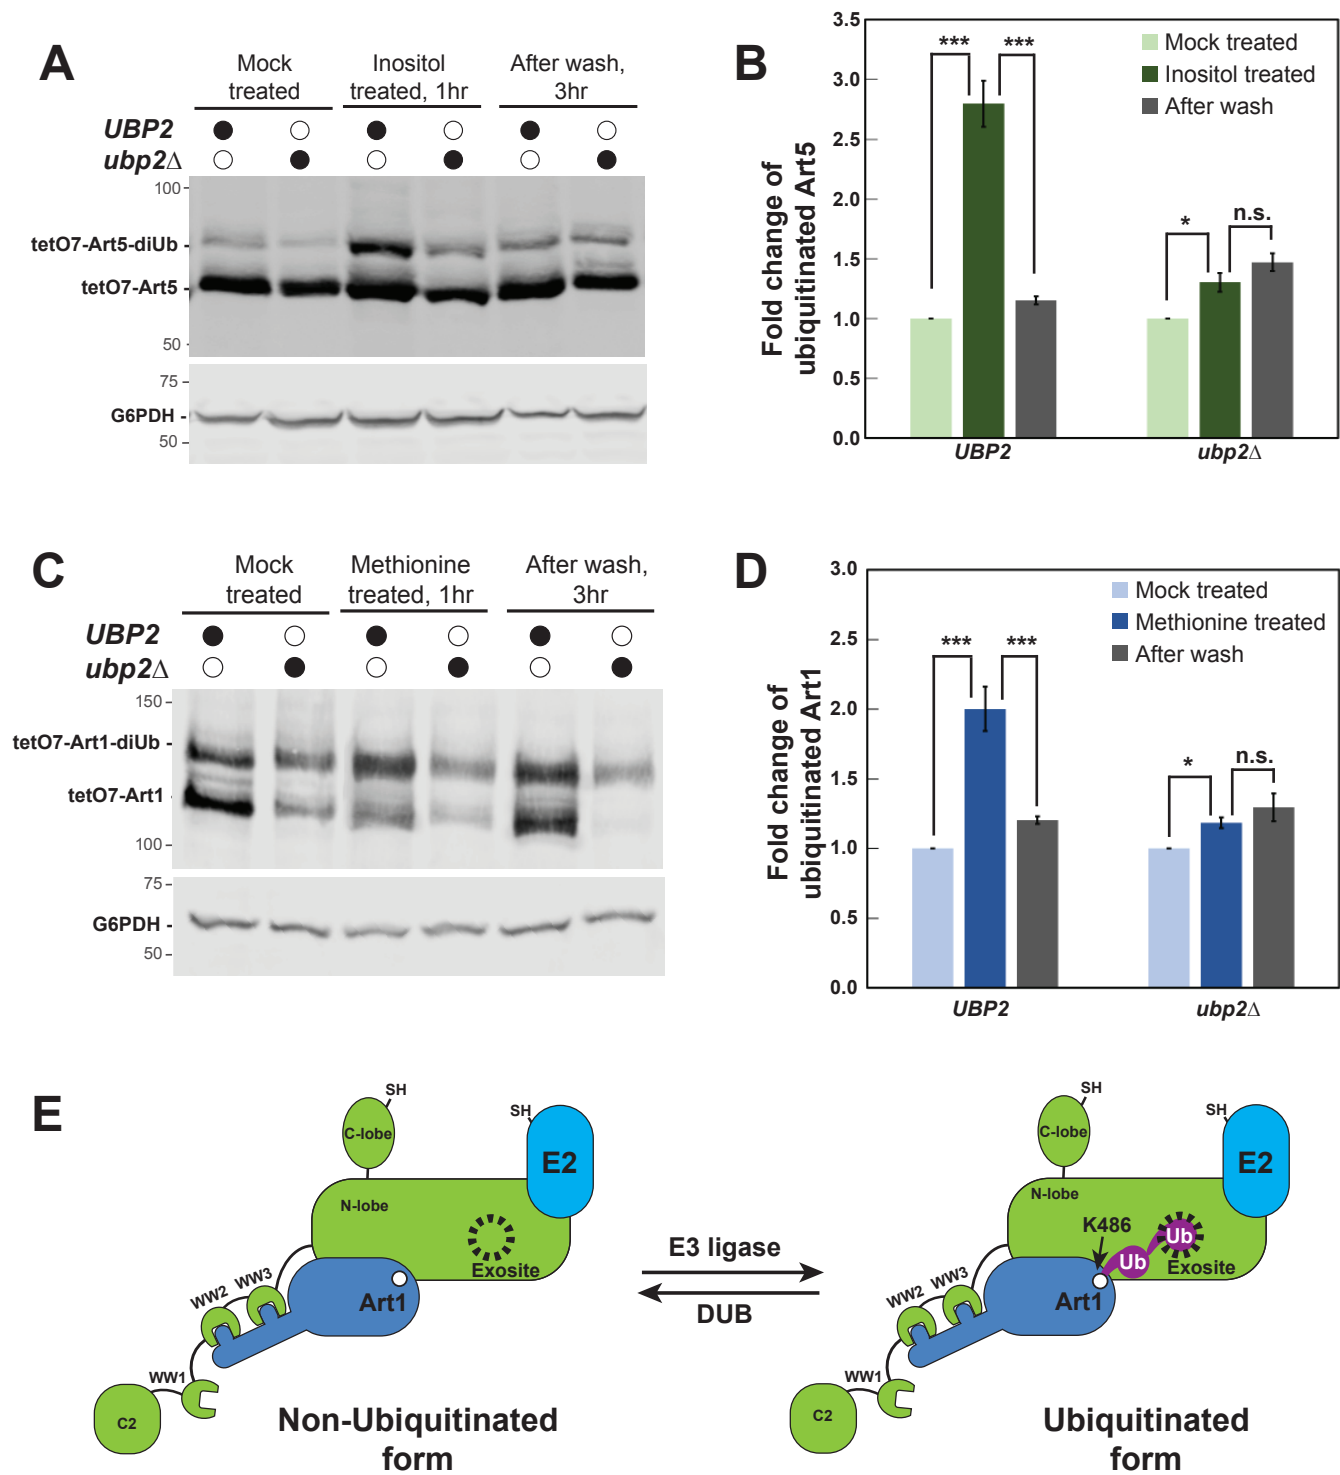

Figure 6-figure supplemental 2

Supplement: supp [file elife_poa_e77424_Figure_6_figure_supplement_2.pdf › elife_poa_e77424_Figure_6_figure_supplement_2.pdf]
